# Supplementary material for: Copy Number Variation in Chickens: A Review and Future Prospects
Source: Microarrays (Basel). 2014 Feb 5;3(1):24–38. doi: 10.3390/microarrays3010024 (PMC5003453; doi:10.3390/microarrays3010024)
Supplement: Supplementary File 1 [file microarrays-03-00024-s001.xlsx]

## Sheet: cnvr4all928
Chicken CNV update
chromosome	CNVR # on chromosome	accumulative size	CNV #	CNVR #	reference	start	stop	size
chr1	1	30169	1	1	Crooijmans, 2013	397234	427403	30169
chr1	1	35198	2	1	Crooijmans, 2013	397234	432432	35198
chr1	2	88123	3	2	Crooijmans, 2013	824439	877364	52925
chr1	3	96963	4	3	Fan 2013	1505661	1514501	8841
chr1	3	113737	5	3	Crooijmans, 2013	1507676	1531275	23599
chr1	3	117355	6	3	Crooijmans, 2013	1507676	1534893	27217
chr1	3	117355	7	3	Crooijmans, 2013	1515168	1534893	19725
chr1	3	117355	8	3	Crooijmans, 2013	1521597	1534893	13296
chr1	3	121403	9	3	Fan 2013	1529061	1538941	9881
chr1	4	151924	10	4	Crooijmans, 2013	1730111	1760632	30521
chr1	4	182396	11	4	Crooijmans, 2013	1730111	1791104	60993
chr1	4	182396	12	4	Crooijmans, 2013	1730718	1743178	12460
chr1	4	182396	13	4	Crooijmans, 2013	1734301	1760632	26331
chr1	4	182396	14	4	Crooijmans, 2013	1734301	1791104	56803
chr1	4	182396	15	4	Crooijmans, 2013	1743119	1753738	10619
chr1	4	182396	16	4	Crooijmans, 2013	1743119	1760632	17513
chr1	4	182396	17	4	Crooijmans, 2013	1743119	1791104	47985
chr1	5	188594	18	5	Crooijmans, 2013	1852157	1858355	6198
chr1	6	251416	19	6	Crooijmans, 2013	2618875	2681697	62822
chr1	6	251416	20	6	Fan 2013	2634061	2653821	19761
chr1	6	251416	21	6	Crooijmans, 2013	2636659	2646758	10099
chr1	6	251416	22	6	Crooijmans, 2013	2636659	2652323	15664
chr1	6	251416	23	6	Crooijmans, 2013	2636659	2655519	18860
chr1	6	251416	24	6	Crooijmans, 2013	2636659	2658483	21824
chr1	6	251416	25	6	Crooijmans, 2013	2636659	2681697	45038
chr1	6	251416	26	6	Crooijmans, 2013	2640398	2646758	6360
chr1	6	251416	27	6	Crooijmans, 2013	2640398	2652323	11925
chr1	6	251416	28	6	Crooijmans, 2013	2640398	2655519	15121
chr1	6	251416	29	6	wang2010	2640470	2650170	9700
chr1	7	264936	30	7	Fan 2013	3129101	3142621	13521
chr1	8	275336	31	8	Fan 2013	3145221	3155621	10401
chr1	9	335404	32	9	wang2010	3930275	3990343	60068
chr1	9	335404	33	9	Crooijmans, 2013	3975881	3987259	11378
chr1	9	347995	34	9	Crooijmans, 2013	3975881	4002934	27053
chr1	9	351588	35	9	Crooijmans, 2013	3975881	4006527	30646
chr1	9	357764	36	9	Crooijmans, 2013	3975881	4012703	36822
chr1	9	357764	37	9	Fan 2013	3980341	3986581	6241
chr1	9	357764	38	9	Crooijmans, 2013	3983005	4006527	23522
chr1	9	406926	39	9	Crooijmans, 2013	3994699	4061865	67166
chr1	9	419672	40	9	Crooijmans, 2013	3994699	4074611	79912
chr1	9	419672	41	9	wang 2012	4014795	4061865	47070
chr1	9	419672	42	9	wang2010	4015022	4062676	47654
chr1	9	419672	42	9	wang2010	4015022	4062676	47654
chr1	9	419672	43	9	Crooijmans, 2013	4020067	4061865	41798
chr1	9	419672	44	9	Crooijmans, 2013	4020067	4074611	54544
chr1	9	419672	45	9	wang 2012	4023885	4061865	37980
chr1	9	419672	46	9	wang2010	4025391	4062676	37285
chr1	9	419672	46	9	wang2010	4025391	4062676	37285
chr1	9	419672	46	9	wang2010	4025391	4062676	37285
chr1	9	419672	47	9	wang2010	4030482	4062676	32194
chr1	9	419672	48	9	Crooijmans, 2013	4030883	4061865	30982
chr1	9	419672	49	9	Crooijmans, 2013	4030883	4074611	43728
chr1	9	419672	50	9	Crooijmans, 2013	4047910	4074611	26701
chr1	9	439623	51	9	Crooijmans, 2013	4047910	4094562	46652
chr1	10	444823	52	10	Fan 2013	4726021	4731221	5201
chr1	11	451063	53	11	Fan 2013	5049981	5056221	6241
chr1	12	460741	54	12	Crooijmans, 2013	5065784	5075462	9678
chr1	13	487802	55	13	Crooijmans, 2013	5858583	5885644	27061
chr1	14	508140	56	14	Crooijmans, 2013	6214725	6235063	20338
chr1	14	531309	57	14	Crooijmans, 2013	6214725	6258232	43507
chr1	15	570077	58	15	Crooijmans, 2013	6680202	6718970	38768
chr1	16	597393	59	16	Crooijmans, 2013	6797992	6825308	27316
chr1	17	603633	60	17	Fan 2013	7423781	7430021	6241
chr1	18	610913	61	18	Fan 2013	7445621	7452901	7281
chr1	19	633543	62	19	Crooijmans, 2013	7454886	7477516	22630
chr1	20	648543	63	20	Luo 2013	7721250	7736250	15000
chr1	20	648543	63	20	Luo 2013	7721250	7736250	15000
chr1	20	650222	64	20	Luo 2013	7722779	7737929	15150
chr1	21	672844	65	21	Crooijmans, 2013	7938711	7961333	22622
chr1	21	692982	66	21	Crooijmans, 2013	7956333	7981471	25138
chr1	21	697320	67	21	Crooijmans, 2013	7968402	7985809	17407
chr1	21	697320	68	21	Crooijmans, 2013	7972143	7985809	13666
chr1	22	707720	69	22	Fan 2013	8435181	8445581	10401
chr1	23	716722	70	23	Crooijmans, 2013	8542172	8551174	9002
chr1	24	896998	71	24	Crooijmans, 2013	9836663	10016939	180276
chr1	24	896998	72	24	Fan 2013	9862581	9868301	5721
chr1	24	896998	73	24	Crooijmans, 2013	9950846	10016939	66093
chr1	25	905318	74	25	Fan 2013	10253101	10261421	8321
chr1	26	939240	75	26	Crooijmans, 2013	10532562	10566484	33922
chr1	26	939240	76	26	Crooijmans, 2013	10535634	10559723	24089
chr1	26	939240	77	26	Crooijmans, 2013	10535634	10562984	27350
chr1	27	956105	78	27	Crooijmans, 2013	11668465	11685330	16865
chr1	27	956105	79	27	Crooijmans, 2013	11671486	11685330	13844
chr1	27	961676	80	27	Fan 2013	11684141	11690901	6761
chr1	28	1026990	81	28	Crooijmans, 2013	12271138	12336452	65314
chr1	28	1033020	82	28	Crooijmans, 2013	12332977	12342482	9505
chr1	28	1063853	83	28	Crooijmans, 2013	12332977	12373315	40338
chr1	28	1063853	84	28	Crooijmans, 2013	12336393	12342482	6089
chr1	28	1066411	85	28	Crooijmans, 2013	12366282	12375873	9591
chr1	29	1072131	86	29	Fan 2013	12379381	12385101	5721
chr1	30	1077331	87	30	Fan 2013	12515101	12520301	5201
chr1	31	1086661	88	31	Crooijmans, 2013	12844003	12853333	9330
chr1	32	1115774	89	32	Crooijmans, 2013	15396930	15426043	29113
chr1	33	1136170	90	33	Crooijmans, 2013	16173482	16193878	20396
chr1	34	1146063	91	34	Crooijmans, 2013	16221015	16230908	9893
chr1	35	1153863	92	35	Fan 2013	16335541	16343341	7801
chr1	36	1159583	93	36	Fan 2013	16713581	16719301	5721
chr1	37	1188661	94	37	Crooijmans, 2013	17055799	17084877	29078
chr1	38	1563642	95	38	Crooijmans, 2013	18720695	19095676	374981
chr1	39	1569362	96	39	Fan 2013	19499741	19505461	5721
chr1	40	1574562	97	40	Fan 2013	20542861	20548061	5201
chr1	41	1592189	98	41	Crooijmans, 2013	20944517	20962144	17627
chr1	41	1592189	99	41	Crooijmans, 2013	20947318	20962144	14826
chr1	42	1601355	100	42	Crooijmans, 2013	21400102	21409268	9166
chr1	43	1609675	101	43	Fan 2013	21723261	21731581	8321
chr1	44	1620261	102	44	Crooijmans, 2013	22359434	22370020	10586
chr1	45	1654028	103	45	Crooijmans, 2013	22544145	22577912	33767
chr1	45	1659422	104	45	Crooijmans, 2013	22560090	22583306	23216
chr1	45	1659422	105	45	Crooijmans, 2013	22564641	22577912	13271
chr1	45	1663918	106	45	wang2010	22570213	22587802	17589
chr1	45	1663918	107	45	Crooijmans, 2013	22571053	22577912	6859
chr1	45	1663918	108	45	wang 2012	22571053	22584919	13866
chr1	46	1684882	109	46	Crooijmans, 2013	22613443	22634407	20964
chr1	47	1720671	110	47	Crooijmans, 2013	22672663	22708452	35789
chr1	48	1733073	111	48	Crooijmans, 2013	23023638	23036040	12402
chr1	48	1735987	112	48	Crooijmans, 2013	23023638	23038954	15316
chr1	48	1735987	113	48	Crooijmans, 2013	23028011	23038954	10943
chr1	49	1741707	114	49	Fan 2013	23794421	23800141	5721
chr1	50	1789045	115	50	wang2010	24045240	24092578	47338
chr1	51	1818937	116	51	Crooijmans, 2013	24547900	24577792	29892
chr1	52	1833244	117	52	wang 2012	25077604	25091911	14307
chr1	53	1855877	118	53	Crooijmans, 2013	26000786	26023419	22633
chr1	54	1877528	119	54	Crooijmans, 2013	26054036	26075687	21651
chr1	54	1877528	120	54	wang 2012	26057817	26075687	17870
chr1	55	1887549	121	55	Crooijmans, 2013	26273875	26283896	10021
chr1	55	1907421	122	55	Crooijmans, 2013	26273875	26303768	29893
chr1	55	1910792	123	55	Crooijmans, 2013	26273875	26307139	33264
chr1	56	1936569	124	56	Crooijmans, 2013	26354890	26380667	25777
chr1	57	1960663	125	57	Crooijmans, 2013	28600861	28624955	24094
chr1	58	1979932	126	58	Crooijmans, 2013	29885959	29905228	19269
chr1	59	1989292	127	59	Fan 2013	29970981	29980341	9361
chr1	60	2006395	128	60	Crooijmans, 2013	31831000	31848103	17103
chr1	60	2014793	129	60	Crooijmans, 2013	31831000	31856501	25501
chr1	61	2046502	130	61	Crooijmans, 2013	32521647	32553356	31709
chr1	62	2061638	131	62	Crooijmans, 2013	32996891	33012027	15136
chr1	63	2068398	132	63	Fan 2013	33701981	33708741	6761
chr1	63	2079457	133	63	wang 2012	33702418	33719800	17382
chr1	64	2092169	134	64	Crooijmans, 2013	34218721	34231433	12712
chr1	64	2092169	135	64	Crooijmans, 2013	34223476	34231433	7957
chr1	65	2097369	136	65	Fan 2013	34426861	34432061	5201
chr1	66	2105490	137	66	Crooijmans, 2013	34436585	34444706	8121
chr1	67	2127603	138	67	Crooijmans, 2013	34631739	34653852	22113
chr1	68	2162851	139	68	Crooijmans, 2013	35823682	35858930	35248
chr1	69	2191394	140	69	Crooijmans, 2013	36206939	36235482	28543
chr1	70	2210366	141	70	Crooijmans, 2013	36382724	36401696	18972
chr1	71	2234711	142	71	Crooijmans, 2013	38219135	38243480	24345
chr1	72	2269709	143	72	Crooijmans, 2013	39134539	39169537	34998
chr1	73	2296782	144	73	Crooijmans, 2013	40471784	40498857	27073
chr1	73	2296782	145	73	Crooijmans, 2013	40487566	40496264	8698
chr1	73	2296782	146	73	Crooijmans, 2013	40487566	40498857	11291
chr1	73	2296782	146	73	wang 2012	40487566	40498857	11291
chr1	74	2320910	147	74	Crooijmans, 2013	41251277	41275405	24128
chr1	74	2329373	148	74	Crooijmans, 2013	41255693	41283868	28175
chr1	75	2380292	149	75	Crooijmans, 2013	41444861	41495780	50919
chr1	76	2404870	150	76	Crooijmans, 2013	41546455	41571033	24578
chr1	77	2427716	151	77	Crooijmans, 2013	41631591	41654437	22846
chr1	77	2427716	152	77	Crooijmans, 2013	41635122	41654437	19315
chr1	78	2448664	153	78	Crooijmans, 2013	41872119	41893067	20948
chr1	79	2464143	154	79	Crooijmans, 2013	42121485	42136964	15479
chr1	80	2469343	155	80	Fan 2013	43229421	43234621	5201
chr1	81	2509953	156	81	Crooijmans, 2013	43916945	43957555	40610
chr1	82	2570085	157	82	wang2010	44977624	45037756	60132
chr1	82	2592789	158	82	wang2010	44980061	45060460	80399
chr1	82	2592789	158	82	wang2010	44980061	45060460	80399
chr1	82	2592789	159	82	wang2010	44982761	45057939	75178
chr1	82	2592789	159	82	wang2010	44982761	45057939	75178
chr1	82	2594989	160	82	wang2010	44982761	45062660	79899
chr1	82	2600295	161	82	wang2010	44982761	45067966	85205
chr1	82	2600295	162	82	wang 2012	44984123	45064556	80433
chr1	82	2600295	162	82	wang 2012	44984123	45064556	80433
chr1	82	2600295	162	82	wang 2012	44984123	45064556	80433
chr1	82	2600295	162	82	wang 2012	44984123	45064556	80433
chr1	82	2600295	163	82	Crooijmans, 2013	44986012	45037421	51409
chr1	82	2600295	164	82	Crooijmans, 2013	44986012	45048025	62013
chr1	82	2600295	165	82	Crooijmans, 2013	44986012	45061560	75548
chr1	82	2600295	166	82	wang 2012	44986012	45064556	78544
chr1	82	2600295	166	82	wang 2012	44986012	45064556	78544
chr1	82	2600295	167	82	Crooijmans, 2013	44986012	45067094	81082
chr1	83	2607575	168	83	Fan 2013	45359861	45367141	7281
chr1	84	2620088	169	84	Crooijmans, 2013	45795271	45807784	12513
chr1	85	2647432	170	85	wang 2012	46766772	46794116	27344
chr1	85	2647432	171	85	wang 2012	46771855	46794116	22261
chr1	85	2647432	172	85	Crooijmans, 2013	46778284	46792290	14006
chr1	86	2687565	173	86	Crooijmans, 2013	47887771	47927904	40133
chr1	87	2730475	174	87	Luo 2013	48000008	48042918	42910
chr1	87	2730475	175	87	wang2010	48005486	48040417	34931
chr1	87	2730475	176	87	Crooijmans, 2013	48010310	48038759	28449
chr1	87	2730475	176	87	wang 2012	48010310	48038759	28449
chr1	87	2730475	176	87	wang 2012	48010310	48038759	28449
chr1	87	2730475	177	87	Crooijmans, 2013	48010310	48041546	31236
chr1	87	2730475	178	87	wang2010	48010453	48040417	29964
chr1	87	2730475	179	87	wang2010	48017853	48040417	22564
chr1	87	2730475	180	87	Crooijmans, 2013	48026079	48038759	12680
chr1	88	2752693	181	88	Crooijmans, 2013	50008209	50030427	22218
chr1	89	2789206	182	89	Crooijmans, 2013	50594407	50630920	36513
chr1	90	2808701	183	90	Crooijmans, 2013	50686041	50705536	19495
chr1	91	2834845	184	91	Crooijmans, 2013	51050962	51077106	26144
chr1	92	2841085	185	92	Fan 2013	53551421	53557661	6241
chr1	93	2849431	186	93	Crooijmans, 2013	55252281	55260627	8346
chr1	93	2868366	187	93	Crooijmans, 2013	55260568	55279562	18994
chr1	93	2874857	188	93	Crooijmans, 2013	55260568	55286053	25485
chr1	94	2903982	189	94	Crooijmans, 2013	55432119	55461244	29125
chr1	95	2915723	190	95	Crooijmans, 2013	56887153	56898894	11741
chr1	96	2923717	191	96	Crooijmans, 2013	57664322	57672316	7994
chr1	96	2928565	192	96	Crooijmans, 2013	57667767	57677164	9397
chr1	96	2943914	193	96	Crooijmans, 2013	57667767	57692513	24746
chr1	97	3086296	194	97	wang2010	58077907	58220289	142382
chr1	98	3120708	195	98	Crooijmans, 2013	58995302	59029714	34412
chr1	99	3133001	196	99	Crooijmans, 2013	59381539	59393832	12293
chr1	99	3136046	197	99	Crooijmans, 2013	59384602	59396877	12275
chr1	100	3168739	198	100	wang2010	59885173	59917866	32693
chr1	100	3168739	198	100	wang2010	59885173	59917866	32693
chr1	101	3193394	199	101	Crooijmans, 2013	60484102	60508757	24655
chr1	101	3197836	200	101	wang 2012	60484102	60513199	29097
chr1	101	3197836	200	101	wang 2012	60484102	60513199	29097
chr1	101	3197836	200	101	wang 2012	60484102	60513199	29097
chr1	101	3202163	201	101	wang2010	60485065	60517526	32461
chr1	102	3229847	202	102	Crooijmans, 2013	60855725	60883409	27684
chr1	103	3260825	203	103	Crooijmans, 2013	60976391	61007369	30978
chr1	103	3260825	204	103	Crooijmans, 2013	60993887	61003350	9463
chr1	104	3290347	205	104	Crooijmans, 2013	61446242	61475764	29522
chr1	105	3324741	206	105	Crooijmans, 2013	62401731	62436125	34394
chr1	106	3343868	207	106	Crooijmans, 2013	62669377	62688504	19127
chr1	106	3347472	208	106	Crooijmans, 2013	62678737	62692108	13371
chr1	106	3347472	209	106	Crooijmans, 2013	62681305	62692108	10803
chr1	106	3347472	210	106	Crooijmans, 2013	62683906	62692108	8202
chr1	107	3382470	211	107	Crooijmans, 2013	62753995	62788993	34998
chr1	107	3382470	212	107	Crooijmans, 2013	62763149	62788993	25844
chr1	107	3382470	213	107	Crooijmans, 2013	62765951	62788993	23042
chr1	108	3402379	214	108	Crooijmans, 2013	62983369	63003278	19909
chr1	109	3432357	215	109	wang2010	64280187	64310165	29978
chr1	110	3442486	216	110	Crooijmans, 2013	64632334	64642463	10129
chr1	110	3443564	217	110	Fan 2013	64638341	64643541	5201
chr1	111	3448764	218	111	Fan 2013	64650301	64655501	5201
chr1	112	3481173	219	112	Crooijmans, 2013	65462253	65494662	32409
chr1	113	3488345	220	113	Crooijmans, 2013	66142200	66149372	7172
chr1	114	3530462	221	114	Crooijmans, 2013	67445541	67487658	42117
chr1	114	3530462	222	114	Crooijmans, 2013	67465172	67487658	22486
chr1	115	3575575	223	115	Crooijmans, 2013	69259874	69304987	45113
chr1	116	3642981	224	116	wang2010	69412827	69480233	67406
chr1	116	3642981	225	116	Crooijmans, 2013	69444109	69454671	10562
chr1	116	3642981	226	116	wang2010	69447932	69455082	7150
chr1	117	3659807	227	117	Crooijmans, 2013	70313941	70330767	16826
chr1	118	3697903	228	118	Crooijmans, 2013	70809479	70847575	38096
chr1	119	3707174	229	119	Crooijmans, 2013	71110178	71119449	9271
chr1	120	3732498	230	120	Crooijmans, 2013	71520371	71545695	25324
chr1	121	3741024	231	121	wang 2012	72295673	72304199	8526
chr1	122	3763548	232	122	Crooijmans, 2013	72585646	72608170	22524
chr1	123	3822577	233	123	Crooijmans, 2013	73534976	73594005	59029
chr1	123	3834857	234	123	Crooijmans, 2013	73534976	73606285	71309
chr1	123	3834857	234	123	Crooijmans, 2013	73534976	73606285	71309
chr1	123	3834857	235	123	Fan 2013	73547501	73556341	8841
chr1	123	3834857	236	123	Crooijmans, 2013	73548674	73583171	34497
chr1	123	3834857	237	123	Fan 2013	73563621	73575061	11441
chr1	123	3834857	238	123	Fan 2013	73576101	73582861	6761
chr1	123	3848797	239	123	Crooijmans, 2013	73580143	73620225	40082
chr1	123	3848797	240	123	Fan 2013	73582861	73588061	5201
chr1	123	3848797	241	123	Crooijmans, 2013	73583112	73620225	37113
chr1	123	3848797	242	123	Crooijmans, 2013	73601527	73616720	15193
chr1	124	3853997	243	124	Fan 2013	73671781	73676981	5201
chr1	125	3884312	244	125	Crooijmans, 2013	73856713	73887028	30315
chr1	126	3914964	245	126	Crooijmans, 2013	74050575	74081227	30652
chr1	127	3927860	246	127	Crooijmans, 2013	74264380	74277276	12896
chr1	128	3951195	247	128	Crooijmans, 2013	74321095	74344430	23335
chr1	129	4098510	248	129	Crooijmans, 2013	74570667	74717982	147315
chr1	129	4154832	249	129	Crooijmans, 2013	74574044	74774304	200260
chr1	129	4165174	250	129	Crooijmans, 2013	74574044	74784646	210602
chr1	129	4165174	251	129	Crooijmans, 2013	74577025	74692146	115121
chr1	129	4165174	252	129	Crooijmans, 2013	74595570	74692146	96576
chr1	129	4165174	253	129	Crooijmans, 2013	74595570	74696364	100794
chr1	130	4178342	254	130	Crooijmans, 2013	75477945	75491113	13168
chr1	131	4230104	255	131	Crooijmans, 2013	75765008	75816770	51762
chr1	131	4230104	256	131	Crooijmans, 2013	75796961	75816770	19809
chr1	132	4243030	257	132	Crooijmans, 2013	79132956	79145882	12926
chr1	133	4258748	258	133	Crooijmans, 2013	79525910	79541628	15718
chr1	133	4258748	259	133	Crooijmans, 2013	79530759	79541628	10869
chr1	134	4266347	260	134	Crooijmans, 2013	79946902	79954501	7599
chr1	134	4273623	261	134	Crooijmans, 2013	79946902	79961777	14875
chr1	134	4279135	262	134	Crooijmans, 2013	79946902	79967289	20387
chr1	134	4284452	263	134	Crooijmans, 2013	79949528	79972606	23078
chr1	135	4297339	264	135	Crooijmans, 2013	80874147	80887034	12887
chr1	135	4306418	265	135	Crooijmans, 2013	80874147	80896113	21966
chr1	136	4329198	266	136	Crooijmans, 2013	81199968	81222748	22780
chr1	136	4363847	267	136	Crooijmans, 2013	81206928	81257397	50469
chr1	136	4363847	268	136	Crooijmans, 2013	81212079	81251159	39080
chr1	136	4363847	269	136	Fan 2013	81216461	81223221	6761
chr1	136	4363847	270	136	Crooijmans, 2013	81219271	81251159	31888
chr1	137	4454645	271	137	Crooijmans, 2013	81261189	81351987	90798
chr1	137	4454645	271	137	Crooijmans, 2013	81261189	81351987	90798
chr1	137	4459395	272	137	Crooijmans, 2013	81261189	81356737	95548
chr1	137	4462576	273	137	Crooijmans, 2013	81261189	81359918	98729
chr1	137	4462576	273	137	Crooijmans, 2013	81261189	81359918	98729
chr1	137	4466530	274	137	Crooijmans, 2013	81261189	81363872	102683
chr1	137	4469337	275	137	Crooijmans, 2013	81261189	81366679	105490
chr1	137	4469337	275	137	Crooijmans, 2013	81261189	81366679	105490
chr1	137	4486631	276	137	Crooijmans, 2013	81261189	81383973	122784
chr1	137	4486631	277	137	Crooijmans, 2013	81266488	81366679	100191
chr1	137	4486631	278	137	Fan 2013	81268981	81276781	7801
chr1	137	4486631	279	137	Crooijmans, 2013	81270387	81359918	89531
chr1	137	4486631	280	137	Crooijmans, 2013	81270387	81366679	96292
chr1	137	4486631	281	137	Fan 2013	81277821	81289261	11441
chr1	137	4486631	282	137	Crooijmans, 2013	81287490	81349409	61919
chr1	138	4502398	283	138	Crooijmans, 2013	81630339	81646106	15767
chr1	138	4502398	284	138	Crooijmans, 2013	81634961	81646106	11145
chr1	139	4516248	285	139	Crooijmans, 2013	81867306	81881156	13850
chr1	139	4524467	286	139	Crooijmans, 2013	81867306	81889375	22069
chr1	139	4535024	287	139	Crooijmans, 2013	81867306	81899932	32626
chr1	139	4535024	288	139	Crooijmans, 2013	81881097	81889375	8278
chr1	140	4570065	289	140	Crooijmans, 2013	82021349	82056390	35041
chr1	141	4599503	290	141	Crooijmans, 2013	82344494	82373932	29438
chr1	142	4635026	291	142	Crooijmans, 2013	82419917	82455440	35523
chr1	143	4640746	292	143	Fan 2013	82915301	82921021	5721
chr1	144	4656217	293	144	Crooijmans, 2013	83476022	83491493	15471
chr1	145	4692083	294	145	Crooijmans, 2013	83848468	83884334	35866
chr1	146	4705924	295	146	Crooijmans, 2013	83931146	83944987	13841
chr1	146	4705924	296	146	Crooijmans, 2013	83933856	83944987	11131
chr1	147	4728102	297	147	Crooijmans, 2013	84700024	84722202	22178
chr1	148	4739542	298	148	Fan 2013	86447661	86459101	11441
chr1	148	4782253	299	148	Crooijmans, 2013	86455059	86501812	46753
chr1	148	4782253	300	148	Fan 2013	86459621	86465861	6241
chr1	148	4782253	301	148	Crooijmans, 2013	86462048	86479821	17773
chr1	148	4782253	302	148	Crooijmans, 2013	86462048	86485817	23769
chr1	148	4782253	303	148	Crooijmans, 2013	86462048	86497663	35615
chr1	148	4782253	304	148	Fan 2013	86468981	86474701	5721
chr1	149	4813994	305	149	Crooijmans, 2013	87490253	87521994	31741
chr1	150	4861091	306	150	Crooijmans, 2013	87834185	87881282	47097
chr1	151	4890395	307	151	Crooijmans, 2013	89067709	89097013	29304
chr1	151	4902765	308	151	Crooijmans, 2013	89067709	89109383	41674
chr1	151	4939300	309	151	Crooijmans, 2013	89067709	89145918	78209
chr1	151	4942443	310	151	Crooijmans, 2013	89125744	89149061	23317
chr1	152	4966805	311	152	Crooijmans, 2013	89153635	89177997	24362
chr1	153	4980409	312	153	Crooijmans, 2013	89926309	89939913	13604
chr1	154	4997430	313	154	Crooijmans, 2013	89981760	89998781	17021
chr1	155	5022576	314	155	Crooijmans, 2013	90845913	90871059	25146
chr1	156	5038244	315	156	Crooijmans, 2013	90892313	90907981	15668
chr1	156	5038244	316	156	Crooijmans, 2013	90901105	90907981	6876
chr1	157	5049684	317	157	Fan 2013	91988781	92000221	11441
chr1	157	5049684	318	157	Crooijmans, 2013	91990551	91999392	8841
chr1	158	5055837	319	158	Crooijmans, 2013	93699330	93705483	6153
chr1	158	5058857	320	158	Crooijmans, 2013	93702708	93708503	5795
chr1	159	5065097	321	159	Fan 2013	94578901	94585141	6241
chr1	160	5070297	322	160	Fan 2013	94969421	94974621	5201
chr1	161	5093359	323	161	Crooijmans, 2013	95072464	95095526	23062
chr1	162	5099079	324	162	Fan 2013	95534141	95539861	5721
chr1	163	5131222	325	163	Crooijmans, 2013	96018371	96050514	32143
chr1	164	5143182	326	164	Fan 2013	98422221	98434181	11961
chr1	164	5143182	327	164	Crooijmans, 2013	98425678	98431839	6161
chr1	164	5145585	328	164	Crooijmans, 2013	98425678	98436584	10906
chr1	164	5159291	329	164	Crooijmans, 2013	98425678	98450290	24612
chr1	164	5159291	330	164	Fan 2013	98434701	98446661	11961
chr1	165	5172395	331	165	Crooijmans, 2013	99207286	99220390	13104
chr1	165	5172395	332	165	Crooijmans, 2013	99209978	99216738	6760
chr1	165	5185921	333	165	Crooijmans, 2013	99209978	99233916	23938
chr1	166	5224921	334	166	Crooijmans, 2013	100808330	100847330	39000
chr1	167	5257351	335	167	Crooijmans, 2013	101045530	101077960	32430
chr1	168	5272251	336	168	Crooijmans, 2013	101130330	101145230	14900
chr1	169	5290911	337	169	Crooijmans, 2013	102072690	102091350	18660
chr1	170	5311781	338	170	Crooijmans, 2013	102709660	102730530	20870
chr1	171	5319181	339	171	Crooijmans, 2013	103286220	103293620	7400
chr1	172	5345011	340	172	Crooijmans, 2013	103788950	103814780	25830
chr1	173	5472391	341	173	Crooijmans, 2013	104376480	104503860	127380
chr1	173	5472391	342	173	Crooijmans, 2013	104448070	104472820	24750
chr1	173	5472391	343	173	Crooijmans, 2013	104448070	104483970	35900
chr1	173	5472391	344	173	Crooijmans, 2013	104448070	104486690	38620
chr1	173	5482141	345	173	Crooijmans, 2013	104448070	104513610	65540
chr1	173	5485881	346	173	Crooijmans, 2013	104448070	104517350	69280
chr1	173	5490951	347	173	Crooijmans, 2013	104448070	104522420	74350
chr1	173	5490951	348	173	Crooijmans, 2013	104451730	104517350	65620
chr1	173	5490951	349	173	Fan 2013	104463061	104473981	10921
chr1	173	5490951	350	173	Crooijmans, 2013	104479440	104503860	24420
chr1	173	5490951	351	173	Crooijmans, 2013	104486640	104517350	30710
chr1	173	5490951	352	173	Fan 2013	104491141	104497381	6241
chr1	173	5490951	353	173	Fan 2013	104502581	104508301	5721
chr1	173	5490951	354	173	Fan 2013	104510901	104520781	9881
chr1	174	5531981	355	174	Crooijmans, 2013	105353440	105394470	41030
chr1	174	5531981	356	174	Crooijmans, 2013	105357700	105394470	36770
chr1	175	5558201	357	175	Crooijmans, 2013	105438560	105464780	26220
chr1	176	5579011	358	176	Crooijmans, 2013	107815550	107836360	20810
chr1	177	5594141	359	177	Crooijmans, 2013	108104540	108119670	15130
chr1	178	5614481	360	178	Crooijmans, 2013	109705300	109725640	20340
chr1	179	5657231	361	179	Crooijmans, 2013	110072040	110114790	42750
chr1	180	5686201	362	180	Crooijmans, 2013	110507960	110536930	28970
chr1	181	5701531	363	181	Crooijmans, 2013	111267440	111282770	15330
chr1	182	5723131	364	182	Crooijmans, 2013	111742430	111764030	21600
chr1	183	5742961	365	183	Crooijmans, 2013	112315920	112335750	19830
chr1	183	5762401	366	183	Crooijmans, 2013	112315920	112355190	39270
chr1	183	5765631	367	183	Crooijmans, 2013	112315920	112358420	42500
chr1	183	5770001	368	183	Crooijmans, 2013	112315920	112362790	46870
chr1	184	5800531	369	184	Crooijmans, 2013	112594820	112625350	30530
chr1	184	5819371	370	184	Crooijmans, 2013	112612690	112644190	31500
chr1	185	5825091	371	185	Fan 2013	112705061	112710781	5721
chr1	186	5843011	372	186	Crooijmans, 2013	113754300	113772220	17920
chr1	187	5848731	373	187	Crooijmans, 2013	113793530	113799250	5720
chr1	188	5862151	374	188	Crooijmans, 2013	114425000	114438420	13420
chr1	189	5892791	375	189	Crooijmans, 2013	114583750	114614390	30640
chr1	189	5895591	376	189	Crooijmans, 2013	114583750	114617190	33440
chr1	189	5895591	377	189	Crooijmans, 2013	114588210	114617190	28980
chr1	190	5912561	378	190	Crooijmans, 2013	114834470	114851440	16970
chr1	191	5927071	379	191	Crooijmans, 2013	114949190	114963700	14510
chr1	191	5940491	380	191	Crooijmans, 2013	114949190	114977120	27930
chr1	191	5940491	381	191	Crooijmans, 2013	114953220	114963700	10480
chr1	192	5967981	382	192	Crooijmans, 2013	115654920	115682410	27490
chr1	193	5993041	383	193	Crooijmans, 2013	116457210	116482270	25060
chr1	194	6012221	384	194	Crooijmans, 2013	117329040	117348220	19180
chr1	194	6012221	385	194	Fan 2013	117334621	117340341	5721
chr1	194	6013702	386	194	Fan 2013	117343461	117349701	6241
chr1	195	6047962	387	195	Crooijmans, 2013	117380910	117415170	34260
chr1	196	6080552	388	196	Crooijmans, 2013	117519220	117551810	32590
chr1	196	6080552	389	196	Crooijmans, 2013	117524180	117551810	27630
chr1	196	6084972	390	196	Crooijmans, 2013	117524180	117556230	32050
chr1	197	6308512	391	197	Crooijmans, 2013	117561450	117784990	223540
chr1	197	6308512	392	197	Crooijmans, 2013	117571840	117784990	213150
chr1	197	6308512	393	197	Crooijmans, 2013	117582610	117784990	202380
chr1	198	6353682	394	198	Crooijmans, 2013	117787880	117833050	45170
chr1	198	6368702	395	198	Crooijmans, 2013	117787880	117848070	60190
chr1	198	6368702	396	198	Crooijmans, 2013	117790710	117833050	42340
chr1	198	6368702	397	198	Crooijmans, 2013	117797170	117833050	35880
chr1	198	6368702	398	198	Fan 2013	117807821	117818741	10921
chr1	198	6374532	399	198	Crooijmans, 2013	117821000	117853900	32900
chr1	199	6389930	400	199	wang 2012	118031006	118046404	15398
chr1	200	6402190	401	200	Crooijmans, 2013	119091740	119104000	12260
chr1	201	6408290	402	201	Crooijmans, 2013	120322350	120328450	6100
chr1	201	6410077	403	201	wang2010	120322636	120330237	7601
chr1	202	6433986	404	202	wang 2012	120916273	120940182	23909
chr1	202	6433986	404	202	wang 2012	120916273	120940182	23909
chr1	202	6446263	405	202	wang 2012	120916273	120952459	36186
chr1	203	6475803	406	203	Crooijmans, 2013	121515330	121544870	29540
chr1	204	6493363	407	204	Crooijmans, 2013	122529960	122547520	17560
chr1	205	6523693	408	205	Crooijmans, 2013	123171390	123201720	30330
chr1	205	6523693	409	205	Crooijmans, 2013	123175740	123201720	25980
chr1	205	6529773	410	205	Crooijmans, 2013	123175740	123207800	32060
chr1	205	6529773	411	205	Crooijmans, 2013	123182370	123207800	25430
chr1	205	6529773	412	205	Crooijmans, 2013	123188930	123199000	10070
chr1	205	6529773	413	205	Crooijmans, 2013	123188930	123207800	18870
chr1	205	6529773	414	205	Crooijmans, 2013	123191720	123201720	10000
chr1	206	6554293	415	206	Crooijmans, 2013	123398100	123422620	24520
chr1	207	6562973	416	207	Crooijmans, 2013	123713150	123721830	8680
chr1	207	6576593	417	207	Crooijmans, 2013	123713150	123735450	22300
chr1	208	6601693	418	208	Crooijmans, 2013	124351960	124377060	25100
chr1	209	6609053	419	209	Crooijmans, 2013	125067110	125074470	7360
chr1	209	6611883	420	209	Crooijmans, 2013	125067110	125077300	10190
chr1	209	6614084	421	209	Fan 2013	125068581	125079501	10921
chr1	210	6651724	422	210	Crooijmans, 2013	125111040	125148680	37640
chr1	211	6675504	423	211	Crooijmans, 2013	126136850	126160630	23780
chr1	211	6687415	424	211	Fan 2013	126149661	126172541	22881
chr1	212	6692615	425	212	Fan 2013	126420061	126425261	5201
chr1	213	6721835	426	213	Crooijmans, 2013	126869380	126898600	29220
chr1	213	6721835	427	213	Crooijmans, 2013	126878600	126889270	10670
chr1	213	6721835	428	213	Crooijmans, 2013	126878600	126893660	15060
chr1	214	6741245	429	214	Crooijmans, 2013	126995400	127014810	19410
chr1	215	6792595	430	215	Crooijmans, 2013	127108720	127160070	51350
chr1	215	6795025	431	215	Luo 2013	127112500	127162500	50000
chr1	215	6795025	431	215	Luo 2013	127112500	127162500	50000
chr1	216	6803205	432	216	Crooijmans, 2013	127491410	127499590	8180
chr1	217	6814155	433	217	Crooijmans, 2013	127760940	127771890	10950
chr1	218	6841805	434	218	Crooijmans, 2013	127968730	127996380	27650
chr1	218	6849425	435	218	Crooijmans, 2013	127979340	128004000	24660
chr1	218	6849425	436	218	Crooijmans, 2013	127983570	128004000	20430
chr1	218	6886525	437	218	Crooijmans, 2013	127988860	128041100	52240
chr1	218	6886525	438	218	Fan 2013	128005021	128012301	7281
chr1	218	6886525	439	218	Crooijmans, 2013	128019880	128038120	18240
chr1	218	6886525	440	218	Crooijmans, 2013	128019880	128041100	21220
chr1	218	6889565	441	218	Crooijmans, 2013	128019880	128044140	24260
chr1	218	6889565	442	218	Crooijmans, 2013	128025000	128041100	16100
chr1	218	6889565	443	218	Crooijmans, 2013	128025000	128044140	19140
chr1	219	6899245	444	219	Crooijmans, 2013	128103050	128112730	9680
chr1	219	6899245	445	219	Crooijmans, 2013	128105730	128112730	7000
chr1	219	6903065	446	219	Crooijmans, 2013	128105730	128116550	10820
chr1	219	6943375	447	219	Crooijmans, 2013	128116490	128156860	40370
chr1	219	6943375	448	219	Fan 2013	128118381	128125661	7281
chr1	219	6943375	449	219	Crooijmans, 2013	128130750	128156860	26110
chr1	220	6955195	450	220	Crooijmans, 2013	128293420	128305240	11820
chr1	221	6962795	451	221	Crooijmans, 2013	128436780	128444380	7600
chr1	221	6972555	452	221	Crooijmans, 2013	128436780	128454140	17360
chr1	221	7002225	453	221	Crooijmans, 2013	128436780	128483810	47030
chr1	222	7008985	454	222	Fan 2013	128548941	128555701	6761
chr1	223	7032025	455	223	Crooijmans, 2013	128726700	128749740	23040
chr1	223	7046445	456	223	Crooijmans, 2013	128743270	128764160	20890
chr1	224	7072535	457	224	Crooijmans, 2013	128890100	128916190	26090
chr1	225	7078455	458	225	Crooijmans, 2013	129099460	129105380	5920
chr1	226	7099095	459	226	Crooijmans, 2013	129143130	129163770	20640
chr1	227	7128405	460	227	Crooijmans, 2013	129614960	129644270	29310
chr1	228	7152885	461	228	Crooijmans, 2013	129728310	129752790	24480
chr1	229	7159125	462	229	Fan 2013	130029381	130035621	6241
chr1	229	7165484	463	229	Crooijmans, 2013	130032590	130041980	9390
chr1	230	7182784	464	230	Crooijmans, 2013	130217070	130234370	17300
chr1	231	7192414	465	231	Crooijmans, 2013	130451280	130460910	9630
chr1	232	7197614	466	232	Fan 2013	131356421	131361621	5201
chr1	233	7216574	467	233	Crooijmans, 2013	132110440	132129400	18960
chr1	234	7223334	468	234	Fan 2013	132424501	132431261	6761
chr1	235	7245544	469	235	Crooijmans, 2013	132743790	132766000	22210
chr1	236	7251264	470	236	Fan 2013	133850341	133856061	5721
chr1	237	7282494	471	237	Crooijmans, 2013	134673690	134704920	31230
chr1	238	7313564	472	238	Crooijmans, 2013	136645450	136676520	31070
chr1	238	7313564	473	238	Crooijmans, 2013	136648770	136663270	14500
chr1	239	7337914	474	239	Crooijmans, 2013	137557530	137581880	24350
chr1	240	7367114	475	240	Crooijmans, 2013	137675460	137704660	29200
chr1	241	7418914	476	241	Crooijmans, 2013	138972360	139024160	51800
chr1	242	7456824	477	242	Crooijmans, 2013	139416560	139454470	37910
chr1	242	7456824	478	242	Crooijmans, 2013	139419610	139446120	26510
chr1	242	7456824	479	242	Crooijmans, 2013	139427080	139451910	24830
chr1	242	7456824	480	242	Crooijmans, 2013	139427080	139454470	27390
chr1	242	7456824	481	242	Crooijmans, 2013	139429950	139440480	10530
chr1	242	7456824	482	242	Crooijmans, 2013	139429950	139446120	16170
chr1	243	7536412	483	243	wang2010	139455477	139535065	79588
chr1	244	7549702	484	244	Crooijmans, 2013	139861310	139874600	13290
chr1	244	7560342	485	244	Crooijmans, 2013	139861310	139885240	23930
chr1	245	7579692	486	245	Crooijmans, 2013	140139730	140159080	19350
chr1	246	7679692	487	246	Luo 2013	140556250	140656250	100000
chr1	246	7679692	488	246	Crooijmans, 2013	140556680	140606550	49870
chr1	246	7679692	489	246	Crooijmans, 2013	140556680	140614680	58000
chr1	246	7679692	490	246	Crooijmans, 2013	140556680	140621380	64700
chr1	246	7679692	491	246	Crooijmans, 2013	140556680	140628510	71830
chr1	246	7679692	492	246	Crooijmans, 2013	140556680	140638080	81400
chr1	246	7679692	493	246	Crooijmans, 2013	140556680	140649450	92770
chr1	246	7679692	494	246	Crooijmans, 2013	140567000	140621380	54380
chr1	246	7679692	495	246	Crooijmans, 2013	140567000	140649450	82450
chr1	246	7679692	496	246	Crooijmans, 2013	140574170	140638080	63910
chr1	246	7679692	497	246	wang2010	140577735	140655038	77303
chr1	246	7679692	498	246	Luo 2013	140580435	140627558	47123
chr1	246	7679692	499	246	Luo 2013	140581250	140656250	75000
chr1	246	7679692	499	246	Luo 2013	140581250	140656250	75000
chr1	246	7679692	500	246	Crooijmans, 2013	140585450	140614680	29230
chr1	247	7701662	501	247	Crooijmans, 2013	140962080	140984050	21970
chr1	248	7728042	502	248	Crooijmans, 2013	142179490	142205870	26380
chr1	248	7773212	503	248	Crooijmans, 2013	142195120	142251040	55920
chr1	249	7795932	504	249	Crooijmans, 2013	142807280	142830000	22720
chr1	249	7795932	505	249	Crooijmans, 2013	142812510	142830000	17490
chr1	249	7796153	506	249	Fan 2013	142816181	142830221	14041
chr1	249	7796153	507	249	Crooijmans, 2013	142818130	142830000	11870
chr1	250	7823063	508	250	Crooijmans, 2013	142986390	143013300	26910
chr1	251	7837623	509	251	Crooijmans, 2013	144180100	144194660	14560
chr1	251	7837623	510	251	Crooijmans, 2013	144185960	144194660	8700
chr1	251	7912243	511	251	Crooijmans, 2013	144185960	144269280	83320
chr1	251	7912243	512	251	Fan 2013	144198341	144209261	10921
chr1	251	7912243	513	251	Crooijmans, 2013	144209250	144240350	31100
chr1	251	7912243	514	251	Crooijmans, 2013	144209250	144246170	36920
chr1	251	7912243	515	251	Crooijmans, 2013	144212400	144240350	27950
chr1	251	7912243	516	251	Crooijmans, 2013	144212400	144264440	52040
chr1	251	7912243	517	251	Crooijmans, 2013	144212400	144269280	56880
chr1	251	7912243	518	251	Fan 2013	144225901	144234741	8841
chr1	251	7912243	519	251	Crooijmans, 2013	144228800	144240350	11550
chr1	251	7912243	519	251	Crooijmans, 2013	144228800	144240350	11550
chr1	251	7912243	520	251	Crooijmans, 2013	144228800	144252820	24020
chr1	251	7912243	521	251	Crooijmans, 2013	144228800	144261110	32310
chr1	251	7912243	522	251	Crooijmans, 2013	144228800	144269280	40480
chr1	251	7983143	523	251	Crooijmans, 2013	144228800	144340180	111380
chr1	251	7999583	524	251	Crooijmans, 2013	144240290	144356620	116330
chr1	251	8005073	525	251	Crooijmans, 2013	144240290	144362110	121820
chr1	251	8005073	526	251	Fan 2013	144242021	144252941	10921
chr1	251	8005073	527	251	Crooijmans, 2013	144246120	144356620	110500
chr1	251	8005073	528	251	Crooijmans, 2013	144246120	144362110	115990
chr1	251	8005073	529	251	Crooijmans, 2013	144249310	144362110	112800
chr1	251	8029183	530	251	Crooijmans, 2013	144249310	144386220	136910
chr1	251	8046023	531	251	Crooijmans, 2013	144249310	144403060	153750
chr1	251	8046023	532	251	Crooijmans, 2013	144255770	144312010	56240
chr1	251	8046023	533	251	Crooijmans, 2013	144264390	144296040	31650
chr1	251	8046023	534	251	Crooijmans, 2013	144269220	144296040	26820
chr1	251	8046023	535	251	Crooijmans, 2013	144275580	144296040	20460
chr1	251	8046023	536	251	Crooijmans, 2013	144278320	144296040	17720
chr1	251	8046023	537	251	Crooijmans, 2013	144291300	144300160	8860
chr1	251	8046023	538	251	Crooijmans, 2013	144300100	144320490	20390
chr1	251	8046023	539	251	Crooijmans, 2013	144300100	144330310	30210
chr1	251	8046023	540	251	Crooijmans, 2013	144300100	144340180	40080
chr1	251	8046023	541	251	Crooijmans, 2013	144300100	144367990	67890
chr1	251	8046023	542	251	Fan 2013	144322101	144327301	5201
chr1	252	8059543	543	252	Fan 2013	145044901	145058421	13521
chr1	253	8086903	544	253	Crooijmans, 2013	145892300	145919660	27360
chr1	254	8092103	545	254	Fan 2013	146070341	146075541	5201
chr1	255	8097303	546	255	Fan 2013	146099981	146105181	5201
chr1	256	8102503	547	256	Fan 2013	146889341	146894541	5201
chr1	257	8133443	548	257	Crooijmans, 2013	146957170	146988110	30940
chr1	258	8141253	549	258	Crooijmans, 2013	147439610	147447420	7810
chr1	259	8166363	550	259	Crooijmans, 2013	148059380	148084490	25110
chr1	259	8166363	551	259	Crooijmans, 2013	148063330	148081930	18600
chr1	259	8166363	552	259	Crooijmans, 2013	148063330	148084490	21160
chr1	260	8180003	553	260	Crooijmans, 2013	148294360	148308000	13640
chr1	261	8206743	554	261	Crooijmans, 2013	149701450	149728190	26740
chr1	262	8226893	555	262	Crooijmans, 2013	150081710	150101860	20150
chr1	263	8235693	556	263	Crooijmans, 2013	150170190	150178990	8800
chr1	264	8255464	557	264	wang 2012	150824463	150844234	19771
chr1	264	8255464	558	264	Crooijmans, 2013	150828990	150844230	15240
chr1	265	8267654	559	265	Crooijmans, 2013	150974610	150986800	12190
chr1	266	8289072	560	266	wang 2012	150992176	151013594	21418
chr1	267	8294272	561	267	Fan 2013	152001981	152007181	5201
chr1	268	8319185	562	268	wang2010	152515110	152540023	24913
chr1	269	8351033	563	269	wang 2012	152966119	152997967	31848
chr1	269	8351033	563	269	wang 2012	152966119	152997967	31848
chr1	269	8351036	564	269	Crooijmans, 2013	152966120	152997970	31850
chr1	269	8355586	565	269	Crooijmans, 2013	152966120	153002520	36400
chr1	270	8392906	566	270	Crooijmans, 2013	153862460	153899780	37320
chr1	271	8399666	567	271	Fan 2013	153965501	153972261	6761
chr1	272	8412772	568	272	wang 2012	154363591	154376697	13106
chr1	273	8425841	569	273	wang 2012	154770643	154783712	13069
chr1	273	8425841	569	273	wang 2012	154770643	154783712	13069
chr1	273	8425841	569	273	wang 2012	154770643	154783712	13069
chr1	274	8431561	570	274	Fan 2013	155704381	155710101	5721
chr1	275	8463371	571	275	Crooijmans, 2013	155892260	155924070	31810
chr1	275	8463371	572	275	Crooijmans, 2013	155900880	155924070	23190
chr1	276	8469091	573	276	Fan 2013	156319021	156324741	5721
chr1	277	8479137	574	277	wang 2012	156585268	156595314	10046
chr1	277	8479137	574	277	wang 2012	156585268	156595314	10046
chr1	278	8685717	575	278	Crooijmans, 2013	156877990	157084570	206580
chr1	278	8685717	576	278	Crooijmans, 2013	157012100	157076040	63940
chr1	279	8698228	577	279	wang 2012	157649247	157661758	12511
chr1	279	8700549	578	279	wang 2012	157649247	157664079	14832
chr1	280	8718423	579	280	wang 2012	158096911	158114785	17874
chr1	281	8727773	580	281	Crooijmans, 2013	158244150	158253500	9350
chr1	282	8743683	581	282	Crooijmans, 2013	158567090	158583000	15910
chr1	282	8743683	582	282	Crooijmans, 2013	158572040	158583000	10960
chr1	282	8743683	583	282	Crooijmans, 2013	158574840	158583000	8160
chr1	282	8758583	584	282	Crooijmans, 2013	158574840	158597900	23060
chr1	282	8803693	585	282	Crooijmans, 2013	158574840	158643010	68170
chr1	283	8840733	586	283	Crooijmans, 2013	158649690	158686730	37040
chr1	284	8855713	587	284	Crooijmans, 2013	158715220	158730200	14980
chr1	285	8889363	588	285	Crooijmans, 2013	160227840	160261490	33650
chr1	286	8920603	589	286	Crooijmans, 2013	161297500	161328740	31240
chr1	287	8944293	590	287	Crooijmans, 2013	162148200	162171890	23690
chr1	287	8945767	591	287	wang 2012	162148200	162173364	25164
chr1	288	8950967	592	288	Fan 2013	163995781	164000981	5201
chr1	289	8957207	593	289	Fan 2013	164061821	164068061	6241
chr1	290	8962407	594	290	Fan 2013	164700381	164705581	5201
chr1	291	9002967	595	291	Fan 2013	165880261	165920821	40561
chr1	291	9074792	596	291	wang2010	165880299	165992646	112347
chr1	291	9074792	597	291	wang2010	165882793	165990143	107350
chr1	291	9074792	598	291	wang2010	165882793	165992646	109853
chr1	291	9074792	598	291	wang2010	165882793	165992646	109853
chr1	291	9074792	599	291	Crooijmans, 2013	165883950	165992630	108680
chr1	291	9083596	600	291	Crooijmans, 2013	165883950	166001450	117500
chr1	291	9083596	601	291	wang 2012	165883954	165908571	24617
chr1	291	9083596	601	291	wang 2012	165883954	165908571	24617
chr1	291	9083596	602	291	wang 2012	165883954	165981982	98028
chr1	291	9083596	603	291	wang2010	165885293	165997655	112362
chr1	291	9083596	604	291	Crooijmans, 2013	165887450	165992630	105180
chr1	291	9083596	605	291	Crooijmans, 2013	165887450	166001450	114000
chr1	291	9083596	606	291	Crooijmans, 2013	165890720	166001450	110730
chr1	291	9083596	607	291	wang 2012	165908631	165979117	70486
chr1	291	9083596	607	291	wang 2012	165908631	165979117	70486
chr1	291	9083596	608	291	Fan 2013	165921341	165966581	45241
chr1	291	9083596	609	291	wang 2012	165942277	165965741	23464
chr1	291	9089287	610	291	Fan 2013	165969701	166007141	37441
chr1	291	9089287	611	291	wang2010	165992646	166002720	10074
chr1	292	9096737	612	292	Crooijmans, 2013	166206940	166214390	7450
chr1	293	9110073	613	293	wang 2012	166754110	166767446	13336
chr1	294	9138213	614	294	wang 2012	167926654	167954794	28140
chr1	294	9138213	614	294	wang 2012	167926654	167954794	28140
chr1	294	9138213	614	294	wang 2012	167926654	167954794	28140
chr1	294	9139993	615	294	wang 2012	167926654	167956574	29920
chr1	294	9139993	615	294	wang 2012	167926654	167956574	29920
chr1	294	9139993	615	294	wang 2012	167926654	167956574	29920
chr1	295	9147363	616	295	Crooijmans, 2013	169230130	169237500	7370
chr1	296	9160033	617	296	Crooijmans, 2013	169935790	169948460	12670
chr1	297	9174683	618	297	Crooijmans, 2013	170134910	170149560	14650
chr1	298	9186763	619	298	Crooijmans, 2013	170243110	170255190	12080
chr1	298	9193153	620	298	Crooijmans, 2013	170243110	170261580	18470
chr1	298	9196693	621	298	Crooijmans, 2013	170243110	170265120	22010
chr1	299	9244883	622	299	Crooijmans, 2013	170411670	170459860	48190
chr1	300	9268553	623	300	Crooijmans, 2013	172342390	172366060	23670
chr1	301	9287433	624	301	Crooijmans, 2013	173150330	173169210	18880
chr1	302	9351383	625	302	Crooijmans, 2013	174738210	174802160	63950
chr1	302	9351383	626	302	Crooijmans, 2013	174759580	174790030	30450
chr1	302	9351383	627	302	Crooijmans, 2013	174763520	174775070	11550
chr1	302	9351383	628	302	Crooijmans, 2013	174763520	174790030	26510
chr1	303	9376253	629	303	Crooijmans, 2013	175188330	175213200	24870
chr1	304	9403583	630	304	Crooijmans, 2013	175690940	175718270	27330
chr1	305	9426078	631	305	wang2010	177747918	177770413	22495
chr1	306	9447078	632	306	Crooijmans, 2013	178251410	178272410	21000
chr1	307	9475788	633	307	Crooijmans, 2013	178319450	178348160	28710
chr1	308	9484018	634	308	Crooijmans, 2013	178425080	178433310	8230
chr1	309	9514608	635	309	Crooijmans, 2013	178631960	178662550	30590
chr1	310	9545108	636	310	Crooijmans, 2013	178949250	178979750	30500
chr1	310	9545108	637	310	Crooijmans, 2013	178962960	178971980	9020
chr1	311	9585568	638	311	Crooijmans, 2013	179020160	179060620	40460
chr1	312	9631448	639	312	Crooijmans, 2013	181363300	181409180	45880
chr1	312	9644788	640	312	Crooijmans, 2013	181384980	181422520	37540
chr1	312	9658398	641	312	Crooijmans, 2013	181409120	181436130	27010
chr1	313	9668858	642	313	Crooijmans, 2013	181479530	181489990	10460
chr1	313	9702468	643	313	Crooijmans, 2013	181479530	181523600	44070
chr1	313	9702468	644	313	Crooijmans, 2013	181483040	181489990	6950
chr1	314	9711048	645	314	Crooijmans, 2013	181785500	181794080	8580
chr1	315	9718108	646	315	Crooijmans, 2013	183216240	183223300	7060
chr1	316	9755568	647	316	Crooijmans, 2013	184050680	184088140	37460
chr1	317	9783368	648	317	Crooijmans, 2013	184311540	184339340	27800
chr1	318	9810438	649	318	Crooijmans, 2013	184478340	184505410	27070
chr1	319	9841008	650	319	Crooijmans, 2013	184854480	184885050	30570
chr1	319	9841008	651	319	Crooijmans, 2013	184857640	184885050	27410
chr1	319	9841010	652	319	wang 2012	184868613	184885052	16439
chr1	319	9841010	652	319	wang 2012	184868613	184885052	16439
chr1	320	9884210	653	320	Crooijmans, 2013	185044180	185087380	43200
chr1	320	9884210	654	320	Crooijmans, 2013	185052800	185077830	25030
chr1	320	9884210	655	320	Crooijmans, 2013	185052800	185087380	34580
chr1	320	9884210	656	320	Crooijmans, 2013	185058110	185087380	29270
chr1	320	9887050	657	320	Crooijmans, 2013	185058110	185090220	32110
chr1	321	9896708	658	321	wang 2012	185168968	185178626	9658
chr1	322	9920178	659	322	Crooijmans, 2013	185318210	185341680	23470
chr1	323	9943388	660	323	Crooijmans, 2013	185363880	185387090	23210
chr1	323	9943388	661	323	Crooijmans, 2013	185369300	185387090	17790
chr1	324	9949708	662	324	Crooijmans, 2013	186492990	186499310	6320
chr1	325	9969708	663	325	Crooijmans, 2013	186816800	186836800	20000
chr1	325	9972488	664	325	Crooijmans, 2013	186816800	186839580	22780
chr1	325	9972488	665	325	Crooijmans, 2013	186820680	186836800	16120
chr1	325	9972488	666	325	Crooijmans, 2013	186820680	186839580	18900
chr1	325	9972488	667	325	Crooijmans, 2013	186828160	186836800	8640
chr1	326	9996988	668	326	Crooijmans, 2013	186882420	186906920	24500
chr1	326	10002278	669	326	Crooijmans, 2013	186882420	186912210	29790
chr1	326	10006138	670	326	Crooijmans, 2013	186882420	186916070	33650
chr1	327	10061738	671	327	Crooijmans, 2013	188439710	188495310	55600
chr1	328	10079658	672	328	Crooijmans, 2013	189866350	189884270	17920
chr1	329	10095958	673	329	Crooijmans, 2013	190039190	190055490	16300
chr1	330	10108667	674	330	wang 2012	190083968	190096677	12709
chr1	331	10114907	675	331	Fan 2013	190322341	190328581	6241
chr1	332	10125757	676	332	Crooijmans, 2013	190597240	190608090	10850
chr1	333	10169877	677	333	Crooijmans, 2013	190777640	190821760	44120
chr1	334	10198597	678	334	Crooijmans, 2013	191105070	191133790	28720
chr1	334	10198597	679	334	Crooijmans, 2013	191108330	191133790	25460
chr1	335	10250697	680	335	Crooijmans, 2013	191162790	191214890	52100
chr1	336	10276557	681	336	Crooijmans, 2013	191460760	191486620	25860
chr1	336	10285377	682	336	Crooijmans, 2013	191460760	191495440	34680
chr1	336	10289017	683	336	Crooijmans, 2013	191460760	191499080	38320
chr1	336	10289017	684	336	Crooijmans, 2013	191464100	191495440	31340
chr1	336	10289017	685	336	Crooijmans, 2013	191466830	191495440	28610
chr1	337	10313107	686	337	Crooijmans, 2013	191787710	191811800	24090
chr1	338	10351907	687	338	Crooijmans, 2013	192332410	192371210	38800
chr1	339	10378257	688	339	Crooijmans, 2013	192439670	192466020	26350
chr1	339	10378257	689	339	Crooijmans, 2013	192443310	192466020	22710
chr1	340	10409017	690	340	Crooijmans, 2013	192872930	192903690	30760
chr1	341	10426987	691	341	Crooijmans, 2013	193228760	193246730	17970
chr1	341	10430077	692	341	Crooijmans, 2013	193228760	193249820	21060
chr1	341	10469197	693	341	Crooijmans, 2013	193249770	193288940	39170
chr1	341	10469197	694	341	Crooijmans, 2013	193252500	193288940	36440
chr1	341	10469197	695	341	Crooijmans, 2013	193266530	193286280	19750
chr1	341	10469197	696	341	Crooijmans, 2013	193266530	193288940	22410
chr1	342	10498307	697	342	Crooijmans, 2013	193322080	193351190	29110
chr1	342	10502277	698	342	Crooijmans, 2013	193333070	193355160	22090
chr1	343	10507477	699	343	Fan 2013	193384621	193389821	5201
chr1	344	10536487	700	344	Crooijmans, 2013	193403250	193432260	29010
chr1	345	10558167	701	345	Crooijmans, 2013	193513340	193535020	21680
chr1	345	10562957	702	345	Crooijmans, 2013	193513340	193539810	26470
chr1	345	10576627	703	345	Crooijmans, 2013	193513340	193553480	40140
chr1	345	10576627	704	345	Crooijmans, 2013	193518290	193539810	21520
chr1	345	10576627	705	345	Crooijmans, 2013	193527450	193535020	7570
chr1	345	10576627	706	345	Crooijmans, 2013	193527450	193539810	12360
chr1	345	10576627	707	345	Crooijmans, 2013	193527450	193548560	21110
chr1	346	10581827	708	346	Fan 2013	194513021	194518221	5201
chr1	347	10589057	709	347	Crooijmans, 2013	194954620	194961850	7230
chr1	348	10596337	710	348	Fan 2013	197455181	197462461	7281
chr1	349	10635827	711	349	Crooijmans, 2013	197526800	197566290	39490
chr1	349	10635827	712	349	Crooijmans, 2013	197546350	197566290	19940
chr1	350	10675783	713	350	wang2010	197700204	197740160	39956
chr1	350	10675783	714	350	Fan 2013	197703221	197712581	9361
chr1	350	10675783	715	350	Crooijmans, 2013	197704530	197725950	21420
chr1	350	10683143	716	350	Crooijmans, 2013	197704530	197747520	42990
chr1	350	10683143	716	350	Crooijmans, 2013	197704530	197747520	42990
chr1	350	10693743	717	350	Crooijmans, 2013	197704530	197758120	53590
chr1	350	10698703	718	350	Crooijmans, 2013	197704530	197763080	58550
chr1	350	10711223	719	350	Crooijmans, 2013	197704530	197775600	71070
chr1	350	10711223	720	350	Crooijmans, 2013	197709680	197747520	37840
chr1	350	10711223	721	350	Crooijmans, 2013	197709680	197775600	65920
chr1	350	10711223	722	350	Crooijmans, 2013	197719600	197747520	27920
chr1	350	10711223	723	350	Crooijmans, 2013	197719600	197752550	32950
chr1	350	10711223	724	350	Crooijmans, 2013	197719600	197758120	38520
chr1	350	10711223	725	350	Crooijmans, 2013	197719600	197775600	56000
chr1	350	10711223	726	350	Fan 2013	197720901	197745861	24961
chr1	350	10711223	727	350	Crooijmans, 2013	197732660	197747520	14860
chr1	350	10718303	728	350	Crooijmans, 2013	197732660	197782680	50020
chr1	350	10718303	729	350	Crooijmans, 2013	197735140	197747520	12380
chr1	350	10718303	730	350	Crooijmans, 2013	197735140	197775600	40460
chr1	351	10745703	731	351	Crooijmans, 2013	197798660	197826060	27400
chr1	352	10763223	732	352	Crooijmans, 2013	197892030	197909550	17520
chr1	352	10782243	733	352	Crooijmans, 2013	197906980	197928570	21590
chr1	352	10788033	734	352	Crooijmans, 2013	197906980	197934360	27380
chr1	352	10793813	735	352	Crooijmans, 2013	197906980	197940140	33160
chr1	353	10824993	736	353	Crooijmans, 2013	198122550	198153730	31180
chr1	354	10848493	737	354	Crooijmans, 2013	198194090	198217590	23500
chr1	355	11059003	738	355	Crooijmans, 2013	198898470	199108980	210510
chr1	355	11078353	739	355	Crooijmans, 2013	198898470	199128330	229860
chr1	355	11078353	740	355	Crooijmans, 2013	199032650	199108980	76330
chr1	355	11078353	741	355	Crooijmans, 2013	199055710	199124700	68990
chr1	355	11097983	742	355	Crooijmans, 2013	199108920	199147960	39040
chr1	355	11097983	743	355	Crooijmans, 2013	199128270	199147960	19690
chr1	356	11149843	744	356	Crooijmans, 2013	199266460	199318320	51860
chr1	356	11149843	745	356	Crooijmans, 2013	199273970	199306940	32970
chr1	356	11149843	746	356	Crooijmans, 2013	199301200	199318320	17120
chr1	357	11176443	747	357	Crooijmans, 2013	199388080	199414680	26600
chr1	358	11195903	748	358	Crooijmans, 2013	199639590	199659050	19460
chr1	358	11195903	749	358	Fan 2013	199648541	199654781	6241
chr1	358	11195903	750	358	Crooijmans, 2013	199649750	199659050	9300
chr1	358	11201073	751	358	Crooijmans, 2013	199653750	199664220	10470
chr1	358	11201073	752	358	Fan 2013	199655301	199663101	7801
chr1	359	11212512	753	359	wang 2012	199667703	199679142	11439
chr1	360	11219792	754	360	Fan 2013	199765541	199772821	7281
chr1	361	11260302	755	361	Crooijmans, 2013	199909280	199949790	40510
chr1	362	11265502	756	362	Fan 2013	200108221	200113421	5201
chr1	363	11291652	757	363	Crooijmans, 2013	200341730	200367880	26150
chr1	363	11294452	758	363	Crooijmans, 2013	200341730	200370680	28950
chr1	364	11314142	759	364	Crooijmans, 2013	200548320	200568010	19690
chr1	364	11349712	760	364	Crooijmans, 2013	200548320	200603580	55260
chr1	364	11349712	761	364	Fan 2013	200552821	200559061	6241
chr1	364	11349712	762	364	Crooijmans, 2013	200555820	200570970	15150
chr1	364	11375702	763	364	Crooijmans, 2013	200599490	200629570	30080
chr10	1	57469	764	365	wang2010	252	57721	57469
chr10	1	57469	765	365	Crooijmans, 2013	5271	23937	18666
chr10	1	57469	766	365	Crooijmans, 2013	5271	32050	26779
chr10	1	78372	767	365	Crooijmans, 2013	47506	78624	31118
chr10	1	81163	768	365	Crooijmans, 2013	47506	81415	33909
chr10	1	81163	769	365	wang 2012	53895	62308	8413
chr10	2	151990	770	366	Crooijmans, 2013	100269	171096	70827
chr10	2	151990	771	366	Crooijmans, 2013	118357	171096	52739
chr10	2	151990	772	366	wang2010	125113	157964	32851
chr10	2	151990	772	366	wang2010	125113	157964	32851
chr10	2	151990	773	366	wang 2012	125155	154978	29823
chr10	2	151990	773	366	wang 2012	125155	154978	29823
chr10	2	151990	774	366	Crooijmans, 2013	127978	157998	30020
chr10	2	151990	775	366	Crooijmans, 2013	127978	171096	43118
chr10	2	156085	776	366	Crooijmans, 2013	127978	175191	47213
chr10	2	178262	777	366	Crooijmans, 2013	127978	197368	69390
chr10	2	183397	778	366	Crooijmans, 2013	127978	202503	74525
chr10	2	193468	779	366	Crooijmans, 2013	127978	212574	84596
chr10	2	198395	780	366	Crooijmans, 2013	127978	217501	89523
chr10	2	198395	781	366	Crooijmans, 2013	134118	157998	23880
chr10	2	198395	782	366	Crooijmans, 2013	134118	171096	36978
chr10	2	198395	783	366	Crooijmans, 2013	137812	160895	23083
chr10	2	198395	784	366	Fan 2013	189541	195781	6241
chr10	3	204960	785	367	wang 2012	779394	785959	6565
chr10	3	204960	785	367	wang 2012	779394	785959	6565
chr10	4	225177	786	368	Crooijmans, 2013	1215819	1236036	20217
chr10	5	237510	787	369	Crooijmans, 2013	1372204	1384537	12333
chr10	6	273327	788	370	Crooijmans, 2013	1421750	1457567	35817
chr10	7	307198	789	371	Crooijmans, 2013	1571738	1605609	33871
chr10	8	332954	790	372	Crooijmans, 2013	3514670	3540426	25756
chr10	8	336269	791	372	Crooijmans, 2013	3514670	3543741	29071
chr10	9	366270	792	373	wang2010	3685104	3715105	30001
chr10	10	378677	793	374	Crooijmans, 2013	3753648	3766055	12407
chr10	10	378677	794	374	Crooijmans, 2013	3757509	3766055	8546
chr10	11	389891	795	375	Crooijmans, 2013	3850637	3861851	11214
chr10	11	407556	796	375	Crooijmans, 2013	3850637	3879516	28879
chr10	12	414767	797	376	Crooijmans, 2013	3898172	3905383	7211
chr10	13	432522	798	377	Crooijmans, 2013	5019330	5037085	17755
chr10	14	457299	799	378	Luo 2013	6842856	6867633	24777
chr10	14	457299	800	378	Crooijmans, 2013	6844846	6866125	21279
chr10	14	457299	801	378	Crooijmans, 2013	6848084	6866125	18041
chr10	15	478035	802	379	Crooijmans, 2013	7135999	7156735	20736
chr10	15	478035	803	379	Crooijmans, 2013	7138655	7156735	18080
chr10	15	494766	804	379	Crooijmans, 2013	7138655	7173466	34811
chr10	15	501070	805	379	Crooijmans, 2013	7138655	7179770	41115
chr10	15	512496	806	379	Crooijmans, 2013	7138655	7191196	52541
chr10	15	512496	807	379	Crooijmans, 2013	7168515	7179770	11255
chr10	16	540864	808	380	Crooijmans, 2013	7908744	7937112	28368
chr10	17	551722	809	381	Crooijmans, 2013	9152895	9163753	10858
chr10	17	554145	810	381	Crooijmans, 2013	9152895	9166176	13281
chr10	18	566616	811	382	Crooijmans, 2013	9209546	9222017	12471
chr10	19	577967	812	383	Crooijmans, 2013	9451014	9462365	11351
chr10	20	587163	813	384	Crooijmans, 2013	9469160	9478356	9196
chr10	20	625602	814	384	Crooijmans, 2013	9469160	9516795	47635
chr10	21	665077	815	385	Crooijmans, 2013	10064690	10104165	39475
chr10	22	691410	816	386	Crooijmans, 2013	10365464	10391797	26333
chr10	22	695155	817	386	Crooijmans, 2013	10365464	10395542	30078
chr10	23	708887	818	387	Crooijmans, 2013	10603435	10617167	13732
chr10	24	747573	819	388	Crooijmans, 2013	12045272	12083958	38686
chr10	24	747573	820	388	Crooijmans, 2013	12070444	12076504	6060
chr10	24	747573	821	388	Fan 2013	12075701	12083501	7801
chr10	25	770517	822	389	wang 2012	13171845	13194789	22944
chr10	26	791874	823	390	Crooijmans, 2013	13487118	13508475	21357
chr10	27	833065	824	391	Crooijmans, 2013	13602504	13643695	41191
chr10	27	833065	825	391	Crooijmans, 2013	13614002	13640611	26609
chr10	28	848816	826	392	Crooijmans, 2013	14627722	14643473	15751
chr10	29	979225	827	393	wang2010	15360091	15490500	130409
chr10	29	979225	828	393	wang2010	15420028	15422528	2500
chr10	29	979225	829	393	Crooijmans, 2013	15442257	15463809	21552
chr10	30	998020	830	394	Crooijmans, 2013	17175129	17193924	18795
chr10	31	1006221	831	395	Crooijmans, 2013	17342009	17350210	8201
chr10	32	1014541	832	396	Fan 2013	17682861	17691181	8321
chr10	33	1037041	833	397	Luo 2013	18813750	18836250	22500
chr10	34	1046253	834	398	Crooijmans, 2013	18899152	18908364	9212
chr10	34	1051748	835	398	Crooijmans, 2013	18905772	18913859	8087
chr10	34	1107306	836	398	Crooijmans, 2013	18908306	18969417	61111
chr10	34	1107306	837	398	Crooijmans, 2013	18913800	18943335	29535
chr10	35	1129828	838	399	Crooijmans, 2013	19386153	19408675	22522
chr10	35	1139273	839	399	Crooijmans, 2013	19391027	19418120	27093
chr10	35	1142480	840	399	Crooijmans, 2013	19391027	19421327	30300
chr10	35	1154144	841	399	Crooijmans, 2013	19391027	19432991	41964
chr10	35	1154144	842	399	Crooijmans, 2013	19397523	19405214	7691
chr10	35	1154144	842	399	Crooijmans, 2013	19397523	19405214	7691
chr10	35	1154144	843	399	Crooijmans, 2013	19397523	19408675	11152
chr10	36	1188665	844	400	Crooijmans, 2013	20259080	20293601	34521
chr10	37	1251545	845	401	Crooijmans, 2013	20601074	20663954	62880
chr10	37	1251545	846	401	Crooijmans, 2013	20641613	20656131	14518
chr10	38	1258402	847	402	Crooijmans, 2013	21029951	21036808	6857
chr10	38	1284870	848	402	Crooijmans, 2013	21029951	21063276	33325
chr10	39	1296012	849	403	Crooijmans, 2013	21658040	21669182	11142
chr10	39	1307915	850	403	Crooijmans, 2013	21658040	21681085	23045
chr10	40	1335934	851	404	Crooijmans, 2013	22041229	22069248	28019
chr10	41	1361027	852	405	Crooijmans, 2013	22145212	22170305	25093
chr10	42	1366747	853	406	Fan 2013	22183981	22189701	5721
chr10	43	1412549	854	407	Crooijmans, 2013	22509377	22555179	45802
chr10	43	1412549	855	407	Crooijmans, 2013	22517017	22552473	35456
chr10	43	1412549	856	407	Crooijmans, 2013	22517017	22555179	38162
chr10	43	1412549	857	407	Crooijmans, 2013	22526047	22555179	29132
chr11	1	20138	858	408	Luo 2013	202	20340	20138
chr11	1	20138	859	408	Crooijmans, 2013	1158	17032	15874
chr11	1	33820	860	408	Crooijmans, 2013	1158	34022	32864
chr11	2	44405	861	409	Crooijmans, 2013	502692	513277	10585
chr11	3	69730	862	410	Crooijmans, 2013	547064	572389	25325
chr11	4	95041	863	411	Crooijmans, 2013	598890	624201	25311
chr11	5	100761	864	412	Fan 2013	1097461	1103181	5721
chr11	6	111580	865	413	Crooijmans, 2013	1144841	1155660	10819
chr11	7	156217	866	414	Crooijmans, 2013	2628018	2672655	44637
chr11	7	156217	867	414	Crooijmans, 2013	2645457	2672655	27198
chr11	7	168754	868	414	wang2010	2670295	2685192	14897
chr11	7	168754	868	414	wang2010	2670295	2685192	14897
chr11	7	170143	869	414	Fan 2013	2672021	2686581	14561
chr11	7	170143	870	414	Crooijmans, 2013	2672596	2685432	12836
chr11	7	170655	871	414	wang 2012	2674301	2687093	12792
chr11	7	170655	871	414	wang 2012	2674301	2687093	12792
chr11	7	170655	872	414	Crooijmans, 2013	2678755	2685432	6677
chr11	7	727313	873	414	Crooijmans, 2013	2678755	3243751	564996
chr11	8	732513	874	415	Fan 2013	4152981	4158181	5201
chr11	9	743562	875	416	Crooijmans, 2013	4865538	4876587	11049
chr11	9	743562	876	416	Fan 2013	4866941	4872141	5201
chr11	10	761183	877	417	Crooijmans, 2013	4940058	4957679	17621
chr11	11	775719	878	418	Crooijmans, 2013	5205209	5219745	14536
chr11	11	775719	879	418	Crooijmans, 2013	5208207	5219745	11538
chr11	12	780919	880	419	Fan 2013	5313621	5318821	5201
chr11	13	787159	881	420	Fan 2013	5681781	5688021	6241
chr11	14	796104	882	421	Crooijmans, 2013	6017662	6026607	8945
chr11	15	827437	883	422	Crooijmans, 2013	7083533	7114866	31333
chr11	16	835575	884	423	Crooijmans, 2013	7496383	7504521	8138
chr11	16	846327	885	423	Crooijmans, 2013	7496383	7515273	18890
chr11	16	853704	886	423	Crooijmans, 2013	7496383	7522650	26267
chr11	16	853704	887	423	Crooijmans, 2013	7504462	7515273	10811
chr11	16	880302	888	423	Crooijmans, 2013	7522591	7549248	26657
chr11	17	905765	889	424	Crooijmans, 2013	7731872	7757335	25463
chr11	18	929425	890	425	Crooijmans, 2013	7918112	7941772	23660
chr11	19	952992	891	426	Crooijmans, 2013	8808639	8832206	23567
chr11	20	969931	892	427	Crooijmans, 2013	8933172	8950111	16939
chr11	20	985384	893	427	Crooijmans, 2013	8945917	8965564	19647
chr11	21	1008135	894	428	Crooijmans, 2013	8974139	8996890	22751
chr11	21	1015600	895	428	Crooijmans, 2013	8996831	9004355	7524
chr11	22	1025082	896	429	wang 2012	10598864	10608346	9482
chr11	23	1043834	897	430	Crooijmans, 2013	10732786	10751538	18752
chr11	23	1048195	898	430	Crooijmans, 2013	10732786	10755899	23113
chr11	23	1058507	899	430	Crooijmans, 2013	10732786	10766211	33425
chr11	23	1058507	900	430	Crooijmans, 2013	10751479	10760804	9325
chr11	24	1063707	901	431	Fan 2013	10984741	10989941	5201
chr11	25	1080581	902	432	Crooijmans, 2013	11040212	11057086	16874
chr11	26	1090189	903	433	Crooijmans, 2013	11074245	11083853	9608
chr11	27	1101712	904	434	Crooijmans, 2013	11389286	11400809	11523
chr11	28	1124871	905	435	Crooijmans, 2013	11995903	12019062	23159
chr11	28	1129767	906	435	Crooijmans, 2013	11995903	12023958	28055
chr11	28	1132940	907	435	Crooijmans, 2013	11995903	12027131	31228
chr11	28	1150348	908	435	Crooijmans, 2013	11999717	12044539	44822
chr11	29	1173839	909	436	Crooijmans, 2013	12136788	12160279	23491
chr11	30	1179039	910	437	Fan 2013	12301901	12307101	5201
chr11	31	1185955	911	438	Crooijmans, 2013	12314149	12321065	6916
chr11	32	1191675	912	439	Fan 2013	12407461	12413181	5721
chr11	33	1220584	913	440	Crooijmans, 2013	12716999	12745908	28909
chr11	34	1339754	914	441	Crooijmans, 2013	12976290	13095460	119170
chr11	35	1344954	915	442	Fan 2013	13332021	13337221	5201
chr11	36	1365043	916	443	Crooijmans, 2013	13410340	13430429	20089
chr11	37	1370243	917	444	Fan 2013	13641421	13646621	5201
chr11	38	1388683	918	445	Crooijmans, 2013	14891335	14909775	18440
chr11	38	1388683	919	445	Crooijmans, 2013	14897605	14909775	12170
chr11	38	1396466	920	445	wang 2012	14897605	14917558	19953
chr11	39	1430051	921	446	Crooijmans, 2013	15224574	15258159	33585
chr11	39	1430051	922	446	Crooijmans, 2013	15229932	15239681	9749
chr11	39	1439365	923	446	Crooijmans, 2013	15254515	15267473	12958
chr11	40	1447685	924	447	Fan 2013	15542021	15550341	8321
chr11	41	1454864	925	448	Crooijmans, 2013	16640392	16647571	7179
chr11	41	1495345	926	448	Crooijmans, 2013	16640392	16688052	47660
chr11	42	1520810	927	449	Crooijmans, 2013	16927219	16952684	25465
chr11	43	1534159	928	450	Crooijmans, 2013	16955037	16968386	13349
chr11	43	1536694	929	450	Crooijmans, 2013	16955037	16970921	15884
chr11	43	1542816	930	450	Crooijmans, 2013	16955037	16977043	22006
chr11	43	1565654	931	450	Crooijmans, 2013	16955037	16999881	44844
chr11	43	1565654	932	450	Crooijmans, 2013	16965556	16979554	13998
chr11	44	1592490	933	451	Crooijmans, 2013	17261369	17288205	26836
chr11	45	1605279	934	452	Crooijmans, 2013	17335799	17348588	12789
chr11	46	1636147	935	453	Crooijmans, 2013	17562508	17593376	30868
chr11	46	1636147	936	453	Crooijmans, 2013	17565270	17593376	28106
chr11	47	1655528	937	454	Crooijmans, 2013	18043985	18063366	19381
chr11	48	1693786	938	455	Crooijmans, 2013	18155223	18193481	38258
chr11	48	1693786	939	455	Crooijmans, 2013	18159694	18193481	33787
chr11	48	1693786	940	455	Crooijmans, 2013	18168629	18189778	21149
chr11	49	1709691	941	456	Crooijmans, 2013	18430837	18446742	15905
chr11	49	1709691	942	456	Crooijmans, 2013	18435236	18446742	11506
chr11	50	1717485	943	457	Crooijmans, 2013	18562648	18570442	7794
chr11	50	1720863	944	457	Crooijmans, 2013	18562648	18573820	11172
chr11	51	1738112	945	458	Crooijmans, 2013	18667998	18685247	17249
chr11	51	1738112	945	458	Crooijmans, 2013	18667998	18685247	17249
chr11	51	1769699	946	458	Crooijmans, 2013	18667998	18716834	48836
chr11	51	1786345	947	458	Crooijmans, 2013	18667998	18733480	65482
chr11	51	1786345	947	458	Crooijmans, 2013	18667998	18733480	65482
chr11	51	1786345	948	458	Crooijmans, 2013	18703300	18716834	13534
chr11	51	1786345	949	458	Crooijmans, 2013	18703300	18719904	16604
chr11	51	1786345	950	458	Crooijmans, 2013	18703300	18733480	30180
chr11	51	1786345	950	458	Crooijmans, 2013	18703300	18733480	30180
chr11	51	1792267	951	458	Crooijmans, 2013	18708832	18739402	30570
chr11	51	1831519	952	458	Crooijmans, 2013	18708832	18778654	69822
chr11	52	1852146	953	459	Crooijmans, 2013	18988373	19009000	20627
chr11	53	1859188	954	460	Crooijmans, 2013	19223603	19230645	7042
chr11	54	1864908	955	461	Fan 2013	19783141	19788861	5721
chr11	54	1870108	956	461	Fan 2013	19788861	19794061	5201
chr11	55	1892194	957	462	Crooijmans, 2013	20406670	20428756	22086
chr11	56	1909446	958	463	Crooijmans, 2013	20694481	20711733	17252
chr11	56	1909446	959	463	Crooijmans, 2013	20699791	20711733	11942
chr11	56	1928357	960	463	Crooijmans, 2013	20699791	20730644	30853
chr11	57	1955749	961	464	Crooijmans, 2013	21455207	21482599	27392
chr12	1	55458	962	465	Crooijmans, 2013	258	55716	55458
chr12	1	55458	963	465	wang2010	15208	45278	30070
chr12	1	92267	964	465	wang2010	15208	92525	77317
chr12	1	92267	965	465	Crooijmans, 2013	23721	50969	27248
chr12	1	92267	966	465	Fan 2013	31461	38221	6761
chr12	2	99027	967	466	Fan 2013	966941	973701	6761
chr12	3	144505	968	467	Crooijmans, 2013	1001669	1047147	45478
chr12	3	144505	969	467	Fan 2013	1030381	1036101	5721
chr12	3	149059	970	467	Fan 2013	1036621	1051701	15081
chr12	3	149365	971	467	Crooijmans, 2013	1041391	1052007	10616
chr12	4	182266	972	468	Crooijmans, 2013	1102174	1135075	32901
chr12	4	188620	973	468	Crooijmans, 2013	1102174	1141429	39255
chr12	4	188620	974	468	Fan 2013	1102661	1107861	5201
chr12	4	188620	975	468	Crooijmans, 2013	1104986	1135075	30089
chr12	4	188620	976	468	Crooijmans, 2013	1104986	1138586	33600
chr12	4	188620	977	468	Crooijmans, 2013	1104986	1141429	36443
chr12	4	200768	978	468	Crooijmans, 2013	1104986	1153577	48591
chr12	4	200768	979	468	Fan 2013	1109421	1123981	14561
chr12	4	200768	980	468	wang 2012	1110289	1135075	24786
chr12	4	200768	980	468	wang 2012	1110289	1135075	24786
chr12	4	200768	981	468	wang 2012	1111713	1135075	23362
chr12	4	200768	982	468	wang 2012	1111713	1138586	26873
chr12	4	200768	983	468	Fan 2013	1134381	1140101	5721
chr12	5	205968	984	469	Fan 2013	1876421	1881621	5201
chr12	5	216641	985	469	Crooijmans, 2013	1876623	1892294	15671
chr12	5	224265	986	469	Crooijmans, 2013	1876623	1899918	23295
chr12	5	247771	987	469	Crooijmans, 2013	1876623	1923424	46801
chr12	5	247771	988	469	Crooijmans, 2013	1899859	1923424	23565
chr12	5	257454	989	469	Crooijmans, 2013	1899859	1933107	33248
chr12	5	257454	990	469	Crooijmans, 2013	1920098	1933107	13009
chr12	6	280365	991	470	Crooijmans, 2013	2067890	2090801	22911
chr12	7	1712619	992	471	wang2010	2135326	3567580	1432254
chr12	7	1712619	993	471	Crooijmans, 2013	2146545	2163760	17215
chr12	7	1712619	994	471	Fan 2013	2148381	2156181	7801
chr12	7	1712619	995	471	Fan 2013	2156701	2165541	8841
chr12	7	1712619	996	471	Crooijmans, 2013	2158807	2168614	9807
chr12	7	1712619	997	471	Crooijmans, 2013	2158807	2198008	39201
chr12	7	1712619	998	471	Crooijmans, 2013	2229413	2255936	26523
chr12	7	1712619	999	471	Crooijmans, 2013	2237037	2267245	30208
chr12	7	1712619	1000	471	Crooijmans, 2013	2246112	2285689	39577
chr12	7	1712619	1001	471	Fan 2013	2486901	2493661	6761
chr12	7	1712619	1002	471	Crooijmans, 2013	2490862	2546240	55378
chr12	7	1712619	1003	471	Crooijmans, 2013	2520918	2546240	25322
chr12	7	1712619	1004	471	Crooijmans, 2013	2525252	2546240	20988
chr12	7	1712619	1005	471	Crooijmans, 2013	2525252	2575021	49769
chr12	7	1712619	1006	471	Crooijmans, 2013	2556614	2575021	18407
chr12	7	1712619	1007	471	Crooijmans, 2013	2561837	2575021	13184
chr12	7	1712619	1008	471	Crooijmans, 2013	2561837	2594090	32253
chr12	7	1712619	1009	471	Crooijmans, 2013	2697810	2741563	43753
chr12	7	1712619	1010	471	Crooijmans, 2013	2715560	2741563	26003
chr12	7	1712619	1011	471	Crooijmans, 2013	2719388	2741563	22175
chr12	7	1712619	1012	471	Crooijmans, 2013	2728695	2759683	30988
chr12	7	1712619	1013	471	Crooijmans, 2013	2734912	2759683	24771
chr12	7	1712619	1014	471	Crooijmans, 2013	2888647	2905802	17155
chr12	7	1712619	1015	471	Crooijmans, 2013	2903024	2921715	18691
chr12	7	1712619	1016	471	Crooijmans, 2013	2908777	2948958	40181
chr12	7	1712619	1017	471	Fan 2013	2973621	2978821	5201
chr12	8	1737619	1018	472	Luo 2013	6131250	6156250	25000
chr12	9	1761520	1019	473	Crooijmans, 2013	7266138	7290039	23901
chr12	10	1822981	1020	474	Crooijmans, 2013	7665496	7726957	61461
chr12	11	1872935	1021	475	Crooijmans, 2013	8012531	8062485	49954
chr12	12	1892234	1022	476	Crooijmans, 2013	8633839	8653138	19299
chr12	13	2444355	1023	477	wang2010	9062975	9615096	552121
chr12	13	2444355	1024	477	Crooijmans, 2013	9082121	9102458	20337
chr12	13	2444355	1025	477	Crooijmans, 2013	9132396	9156017	23621
chr12	13	2444355	1026	477	Crooijmans, 2013	9137099	9156017	18918
chr12	13	2444355	1027	477	Crooijmans, 2013	9578438	9604465	26027
chr12	14	2469678	1028	478	Crooijmans, 2013	10025171	10050494	25323
chr12	14	2483035	1029	478	Crooijmans, 2013	10027990	10063851	35861
chr12	15	2503664	1030	479	Crooijmans, 2013	10489660	10510289	20629
chr12	16	2517837	1031	480	Crooijmans, 2013	12236083	12250256	14173
chr12	17	2542329	1032	481	Crooijmans, 2013	12850773	12875265	24492
chr12	18	2567403	1033	482	Crooijmans, 2013	13577318	13602392	25074
chr12	19	2587137	1034	483	Crooijmans, 2013	13827608	13847342	19734
chr12	19	2604443	1035	483	Crooijmans, 2013	13834294	13864648	30354
chr12	20	2621745	1036	484	Crooijmans, 2013	13931771	13949073	17302
chr12	21	2644123	1037	485	Crooijmans, 2013	14825393	14847771	22378
chr12	22	2660526	1038	486	Crooijmans, 2013	14926254	14942657	16403
chr12	23	2668541	1039	487	Crooijmans, 2013	15223331	15231346	8015
chr12	24	2712561	1040	488	Crooijmans, 2013	15553101	15597121	44020
chr12	25	2731631	1041	489	Crooijmans, 2013	15729868	15748938	19070
chr12	25	2737923	1042	489	Crooijmans, 2013	15729868	15755230	25362
chr12	25	2760269	1043	489	Crooijmans, 2013	15729868	15777576	47708
chr12	26	2767850	1044	490	Crooijmans, 2013	15829358	15836939	7581
chr12	26	2787849	1045	490	Crooijmans, 2013	15829358	15856938	27580
chr12	27	2793569	1046	491	Fan 2013	16363101	16368821	5721
chr12	28	2802419	1047	492	Crooijmans, 2013	17839780	17848630	8850
chr12	29	2812469	1048	493	Crooijmans, 2013	17962481	17972531	10050
chr12	30	2825251	1049	494	Crooijmans, 2013	18229925	18242707	12782
chr12	31	2834230	1050	495	Crooijmans, 2013	18362139	18371118	8979
chr12	32	2843798	1051	496	Crooijmans, 2013	18793362	18802930	9568
chr12	32	2860464	1052	496	Crooijmans, 2013	18793362	18819596	26234
chr12	33	2876726	1053	497	wang 2012	19141500	19157762	16262
chr12	34	2906682	1054	498	Crooijmans, 2013	19778409	19808365	29956
chr13	1	5720	1055	499	Fan 2013	499461	505181	5721
chr13	1	73592	1056	499	Crooijmans, 2013	503330	573053	69723
chr13	1	76241	1057	499	Crooijmans, 2013	503330	575702	72372
chr13	1	78981	1058	499	Crooijmans, 2013	503330	578442	75112
chr13	1	88671	1059	499	Crooijmans, 2013	503330	588132	84802
chr13	1	88671	1060	499	Crooijmans, 2013	505737	578442	72705
chr13	1	88671	1061	499	Crooijmans, 2013	519087	578442	59355
chr13	1	88671	1062	499	Crooijmans, 2013	527932	554814	26882
chr13	1	88671	1063	499	Fan 2013	530141	535341	5201
chr13	1	88671	1064	499	Fan 2013	571221	584221	13001
chr13	2	125967	1065	500	Crooijmans, 2013	611558	648854	37296
chr13	2	125967	1066	500	Crooijmans, 2013	619425	648854	29429
chr13	3	188987	1067	501	Crooijmans, 2013	699666	762686	63020
chr13	3	188987	1068	501	Crooijmans, 2013	703857	734255	30398
chr13	3	188987	1069	501	Crooijmans, 2013	703857	754426	50569
chr13	3	188987	1070	501	Crooijmans, 2013	703857	759519	55662
chr13	3	188987	1071	501	Crooijmans, 2013	703857	762686	58829
chr13	3	206267	1072	501	Crooijmans, 2013	703857	779966	76109
chr13	3	206267	1073	501	Crooijmans, 2013	707960	734255	26295
chr13	3	206267	1074	501	Crooijmans, 2013	707960	738410	30450
chr13	3	206267	1075	501	Crooijmans, 2013	707960	741024	33064
chr13	3	206267	1076	501	Crooijmans, 2013	707960	759519	51559
chr13	3	206267	1077	501	Crooijmans, 2013	707960	762686	54726
chr13	3	206267	1078	501	Crooijmans, 2013	713010	754426	41416
chr13	3	206267	1079	501	Crooijmans, 2013	713010	762686	49676
chr13	3	206267	1080	501	Crooijmans, 2013	721265	734255	12990
chr13	3	206267	1081	501	Crooijmans, 2013	721265	741024	19759
chr13	3	206267	1082	501	Crooijmans, 2013	725406	734255	8849
chr13	3	206267	1083	501	Crooijmans, 2013	725406	738410	13004
chr13	3	206267	1084	501	Crooijmans, 2013	725406	745626	20220
chr13	3	206267	1085	501	Crooijmans, 2013	725406	759519	34113
chr13	3	206267	1086	501	Fan 2013	728781	736061	7281
chr13	3	206267	1087	501	Fan 2013	740221	749061	8841
chr13	3	206267	1088	501	Crooijmans, 2013	740972	773229	32257
chr13	3	206267	1089	501	wang 2012	744200	776143	31943
chr13	3	206267	1090	501	wang2010	745149	772542	27393
chr13	3	206267	1091	501	wang2010	767692	772542	4850
chr13	4	466556	1092	502	Crooijmans, 2013	1330959	1591248	260289
chr13	4	471754	1093	502	Crooijmans, 2013	1339676	1596446	256770
chr13	4	471754	1094	502	Crooijmans, 2013	1355667	1596446	240779
chr13	4	471754	1095	502	Crooijmans, 2013	1547024	1572701	25677
chr13	4	471754	1096	502	Fan 2013	1578461	1593541	15081
chr13	4	471754	1097	502	Crooijmans, 2013	1579387	1591248	11861
chr13	4	471754	1098	502	Crooijmans, 2013	1579387	1596446	17059
chr13	5	477699	1099	503	Crooijmans, 2013	2230669	2236614	5945
chr13	6	489551	1100	504	Crooijmans, 2013	2588870	2600722	11852
chr13	7	549859	1101	505	wang2010	2722503	2782811	60308
chr13	7	549859	1101	505	wang2010	2722503	2782811	60308
chr13	7	554809	1102	505	wang2010	2725502	2787761	62259
chr13	8	562089	1103	506	Fan 2013	3058901	3066181	7281
chr13	9	570031	1104	507	wang 2012	3189249	3197191	7942
chr13	10	598997	1105	508	Crooijmans, 2013	3322177	3351143	28966
chr13	11	618432	1106	509	wang 2012	3970499	3989934	19435
chr13	11	618432	1106	509	wang 2012	3970499	3989934	19435
chr13	12	669457	1107	510	Crooijmans, 2013	4454411	4505436	51025
chr13	12	669457	1108	510	Crooijmans, 2013	4458709	4484738	26029
chr13	12	669457	1109	510	Crooijmans, 2013	4476352	4505436	29084
chr13	12	669457	1110	510	Crooijmans, 2013	4479117	4505436	26319
chr13	12	672209	1111	510	Crooijmans, 2013	4479117	4508188	29071
chr13	12	672209	1112	510	Crooijmans, 2013	4499083	4505436	6353
chr13	13	690673	1113	511	Crooijmans, 2013	4630561	4649025	18464
chr13	14	704967	1114	512	wang 2012	6755602	6769896	14294
chr13	15	724428	1115	513	wang 2012	6888448	6907909	19461
chr13	16	743036	1116	514	Crooijmans, 2013	7283417	7302025	18608
chr13	16	748352	1117	514	Crooijmans, 2013	7288790	7307341	18551
chr13	17	767575	1118	515	Crooijmans, 2013	7497358	7516581	19223
chr13	18	798175	1119	516	Crooijmans, 2013	8144435	8175035	30600
chr13	18	798175	1120	516	Crooijmans, 2013	8156275	8161562	5287
chr13	18	798175	1121	516	Crooijmans, 2013	8156275	8175035	18760
chr13	18	798175	1122	516	Crooijmans, 2013	8159019	8175035	16016
chr13	18	798175	1123	516	Crooijmans, 2013	8161517	8175035	13518
chr13	19	815557	1124	517	Crooijmans, 2013	8530322	8547704	17382
chr13	19	840503	1125	517	Crooijmans, 2013	8530322	8572650	42328
chr13	19	840503	1126	517	Crooijmans, 2013	8534766	8554555	19789
chr13	19	840503	1127	517	Crooijmans, 2013	8534766	8559250	24484
chr13	19	840503	1128	517	Crooijmans, 2013	8534766	8572650	37884
chr13	19	840503	1129	517	Crooijmans, 2013	8543423	8572650	29227
chr13	19	840503	1130	517	Crooijmans, 2013	8563235	8572650	9415
chr13	19	855077	1131	517	Crooijmans, 2013	8563235	8587224	23989
chr13	20	879956	1132	518	Crooijmans, 2013	8656006	8680885	24879
chr13	20	887709	1133	518	Crooijmans, 2013	8656006	8688638	32632
chr13	20	894690	1134	518	Crooijmans, 2013	8656006	8695619	39613
chr13	20	894690	1135	518	Crooijmans, 2013	8660043	8677256	17213
chr13	20	901637	1136	518	Crooijmans, 2013	8660043	8702566	42523
chr13	20	901637	1137	518	Crooijmans, 2013	8665517	8677256	11739
chr13	21	906837	1138	519	Fan 2013	9018621	9023821	5201
chr13	22	934240	1139	520	Crooijmans, 2013	9532547	9559950	27403
chr13	22	934240	1140	520	Crooijmans, 2013	9536225	9559950	23725
chr13	23	942442	1141	521	Crooijmans, 2013	9650577	9658779	8202
chr13	24	948682	1142	522	Fan 2013	10065901	10072141	6241
chr13	25	989063	1143	523	Crooijmans, 2013	10132366	10172747	40381
chr13	26	995303	1144	524	Fan 2013	10743981	10750221	6241
chr13	27	1010794	1145	525	Crooijmans, 2013	11355091	11370582	15491
chr13	28	1025229	1146	526	wang 2012	12115000	12129435	14435
chr13	29	1054099	1147	527	Crooijmans, 2013	12732037	12760907	28870
chr13	30	1079869	1148	528	Crooijmans, 2013	13000414	13026184	25770
chr13	31	1129568	1149	529	Crooijmans, 2013	13122609	13172308	49699
chr13	32	1168552	1150	530	Crooijmans, 2013	14511843	14550827	38984
chr13	33	1173752	1151	531	Fan 2013	15143181	15148381	5201
chr13	34	1186798	1152	532	wang 2012	15750417	15763463	13046
chr13	34	1189525	1153	532	wang 2012	15750417	15766190	15773
chr13	34	1189525	1153	532	wang 2012	15750417	15766190	15773
chr13	34	1196835	1154	532	wang 2012	15750417	15773500	23083
chr13	34	1196835	1154	532	wang 2012	15750417	15773500	23083
chr13	34	1199547	1155	532	wang 2012	15750417	15776212	25795
chr13	34	1199547	1156	532	Crooijmans, 2013	15751888	15769598	17710
chr13	34	1199547	1157	532	Fan 2013	15763021	15771341	8321
chr13	35	1212631	1158	533	Crooijmans, 2013	15794176	15807260	13084
chr13	35	1225548	1159	533	Crooijmans, 2013	15798928	15820177	21249
chr13	36	1255108	1160	534	Crooijmans, 2013	16034348	16063908	29560
chr13	37	1263111	1161	535	Crooijmans, 2013	16803951	16811954	8003
chr13	38	1286839	1162	536	Crooijmans, 2013	17044653	17068381	23728
chr13	39	1293829	1163	537	Crooijmans, 2013	17290473	17297463	6990
chr13	40	1300436	1164	538	Crooijmans, 2013	17334519	17341126	6607
chr13	41	1317539	1165	539	Crooijmans, 2013	17489940	17507043	17103
chr13	42	1326221	1166	540	Crooijmans, 2013	18371723	18380405	8682
chr13	42	1326221	1166	540	wang 2012	18371723	18380405	8682
chr13	42	1329217	1167	540	Crooijmans, 2013	18371723	18383401	11678
chr13	42	1332486	1168	540	Crooijmans, 2013	18371723	18386670	14947
chr13	43	1362013	1169	541	Crooijmans, 2013	18881877	18911404	29527
chr14	1	23400	1170	542	Fan 2013	774021	797421	23401
chr14	1	23400	1171	542	Crooijmans, 2013	776500	794901	18401
chr14	2	43450	1172	543	Crooijmans, 2013	1402627	1422677	20050
chr14	3	70956	1173	544	Crooijmans, 2013	1760237	1787743	27506
chr14	3	75758	1174	544	Crooijmans, 2013	1760237	1792545	32308
chr14	4	113465	1175	545	Crooijmans, 2013	2358722	2396429	37707
chr14	5	123865	1176	546	Fan 2013	2401621	2412021	10401
chr14	6	132185	1177	547	Fan 2013	2412541	2420861	8321
chr14	7	147539	1178	548	Crooijmans, 2013	2784521	2799875	15354
chr14	8	161426	1179	549	Crooijmans, 2013	4416130	4430017	13887
chr14	9	171306	1180	550	Fan 2013	4551301	4561181	9881
chr14	10	178586	1181	551	Fan 2013	4567941	4575221	7281
chr14	11	222118	1182	552	Crooijmans, 2013	5039419	5082951	43532
chr14	12	252946	1183	553	Crooijmans, 2013	5127324	5158152	30828
chr14	13	267921	1184	554	Crooijmans, 2013	5483766	5498741	14975
chr14	13	275842	1185	554	Crooijmans, 2013	5483766	5506662	22896
chr14	14	307596	1186	555	Crooijmans, 2013	6181285	6213039	31754
chr14	15	340732	1187	556	Crooijmans, 2013	6488819	6521955	33136
chr14	16	379555	1188	557	Crooijmans, 2013	6807771	6846594	38823
chr14	17	392879	1189	558	Crooijmans, 2013	7331988	7345312	13324
chr14	17	392879	1190	558	Crooijmans, 2013	7339992	7345312	5320
chr14	18	414387	1191	559	Crooijmans, 2013	8476778	8498286	21508
chr14	18	414387	1192	559	Crooijmans, 2013	8480781	8498286	17505
chr14	19	437918	1193	560	Crooijmans, 2013	8557351	8580882	23531
chr14	20	456956	1194	561	Crooijmans, 2013	8602995	8622033	19038
chr14	21	493674	1195	562	Crooijmans, 2013	9662698	9699416	36718
chr14	21	493674	1196	562	Crooijmans, 2013	9682387	9699416	17029
chr14	22	522159	1197	563	Crooijmans, 2013	10119419	10147904	28485
chr14	23	546962	1198	564	wang2010	11032783	11057586	24803
chr14	24	570248	1199	565	Crooijmans, 2013	11268248	11291534	23286
chr14	25	575448	1200	566	Fan 2013	11818821	11824021	5201
chr14	26	602691	1201	567	Crooijmans, 2013	11976224	12003467	27243
chr14	27	616402	1202	568	Crooijmans, 2013	12051146	12064857	13711
chr14	27	619584	1203	568	Crooijmans, 2013	12051146	12068039	16893
chr14	28	642839	1204	569	Crooijmans, 2013	12219689	12242944	23255
chr14	28	659310	1205	569	Crooijmans, 2013	12236440	12259415	22975
chr14	29	680281	1206	570	Crooijmans, 2013	12293278	12314249	20971
chr14	29	686263	1207	570	Crooijmans, 2013	12293278	12320231	26953
chr14	30	701034	1208	571	wang2010	12495310	12510081	14771
chr14	30	701034	1209	571	Crooijmans, 2013	12500394	12505273	4879
chr14	31	706754	1210	572	Fan 2013	12516141	12521861	5721
chr14	32	720794	1211	573	Fan 2013	12673181	12687221	14041
chr14	32	730674	1212	573	Fan 2013	12687221	12697101	9881
chr14	33	755076	1213	574	Crooijmans, 2013	13053672	13078074	24402
chr14	34	771166	1214	575	Crooijmans, 2013	13085562	13101652	16090
chr14	34	776984	1215	575	Crooijmans, 2013	13085562	13107470	21908
chr14	35	808079	1216	576	Crooijmans, 2013	13538651	13569746	31095
chr14	36	821524	1217	577	Crooijmans, 2013	13986359	13999804	13445
chr14	37	826724	1218	578	Fan 2013	14327301	14332501	5201
chr14	38	880735	1219	579	Crooijmans, 2013	14361197	14415208	54011
chr14	38	880735	1220	579	Crooijmans, 2013	14364439	14397170	32731
chr14	38	880735	1221	579	Crooijmans, 2013	14364439	14402024	37585
chr14	38	880735	1222	579	Crooijmans, 2013	14364439	14410043	45604
chr14	38	880735	1222	579	Crooijmans, 2013	14364439	14410043	45604
chr14	38	880735	1223	579	Crooijmans, 2013	14364439	14415208	50769
chr14	38	884469	1224	579	Crooijmans, 2013	14364439	14418942	54503
chr14	38	884469	1225	579	Fan 2013	14366821	14374621	7801
chr14	38	884469	1226	579	Crooijmans, 2013	14369849	14415208	45359
chr14	38	884469	1227	579	Crooijmans, 2013	14374008	14415208	41200
chr14	38	884469	1228	579	Crooijmans, 2013	14374008	14418942	44934
chr14	38	957726	1229	579	Crooijmans, 2013	14374008	14492199	118191
chr14	38	957726	1230	579	Crooijmans, 2013	14378671	14410043	31372
chr14	38	957726	1231	579	Crooijmans, 2013	14378671	14426782	48111
chr14	38	957726	1232	579	Fan 2013	14379821	14389181	9361
chr14	38	957726	1233	579	Fan 2013	14390221	14406861	16641
chr14	38	957726	1234	579	Fan 2013	14408421	14413621	5201
chr14	38	957726	1235	579	Crooijmans, 2013	14454934	14492199	37265
chr14	38	957726	1236	579	Crooijmans, 2013	14463685	14492199	28514
chr14	38	957726	1237	579	Crooijmans, 2013	14469481	14479595	10114
chr14	38	957726	1238	579	Crooijmans, 2013	14469481	14492199	22718
chr14	39	972426	1239	580	wang 2012	14600145	14614845	14700
chr14	40	1030047	1240	581	Crooijmans, 2013	14997075	15054696	57621
chr14	40	1030047	1241	581	Crooijmans, 2013	15019113	15054696	35583
chr14	40	1032909	1242	581	Crooijmans, 2013	15019113	15057558	38445
chr14	40	1032909	1243	581	Fan 2013	15042821	15048541	5721
chr14	40	1032909	1244	581	Crooijmans, 2013	15043606	15054696	11090
chr14	41	1136391	1245	582	Crooijmans, 2013	15711709	15815191	103482
chr15	1	38884	1246	583	Crooijmans, 2013	1	38885	38885
chr15	2	69924	1247	584	Crooijmans, 2013	743435	774475	31040
chr15	3	75644	1248	585	Fan 2013	931061	936781	5721
chr15	4	88735	1249	586	wang 2012	1085436	1098527	13091
chr15	5	101275	1250	587	Crooijmans, 2013	2376466	2389006	12540
chr15	6	135074	1251	588	Crooijmans, 2013	2529053	2562852	33799
chr15	6	175017	1252	588	Crooijmans, 2013	2553286	2602795	49509
chr15	7	374929	1253	589	wang2010	2637840	2837752	199912
chr15	7	374929	1254	589	Crooijmans, 2013	2689443	2701224	11781
chr15	7	374929	1255	589	Crooijmans, 2013	2689443	2706417	16974
chr15	7	374929	1256	589	Crooijmans, 2013	2732016	2766947	34931
chr15	8	397029	1257	590	Crooijmans, 2013	3278096	3300196	22100
chr15	9	436645	1258	591	Crooijmans, 2013	4625673	4665289	39616
chr15	9	447662	1259	591	Crooijmans, 2013	4632860	4676306	43446
chr15	9	447662	1260	591	Crooijmans, 2013	4646354	4676306	29952
chr15	10	482862	1261	592	Crooijmans, 2013	4711428	4746628	35200
chr15	11	509817	1262	593	Crooijmans, 2013	4985572	5012527	26955
chr15	12	554736	1263	594	Crooijmans, 2013	5089094	5134013	44919
chr15	13	585070	1264	595	wang2010	5180089	5210423	30334
chr15	14	625790	1265	596	Crooijmans, 2013	6132731	6173451	40720
chr15	15	642380	1266	597	Crooijmans, 2013	6926180	6942770	16590
chr15	15	649569	1267	597	Crooijmans, 2013	6942711	6949959	7248
chr15	16	681462	1268	598	Crooijmans, 2013	7039248	7071141	31893
chr15	16	692446	1269	598	Crooijmans, 2013	7068069	7082125	14056
chr15	16	697790	1270	598	Crooijmans, 2013	7068069	7087469	19400
chr15	16	697790	1271	598	Crooijmans, 2013	7078442	7087469	9027
chr15	16	697790	1272	598	Crooijmans, 2013	7082066	7087469	5403
chr15	17	721417	1273	599	Crooijmans, 2013	7135638	7159265	23627
chr15	18	727407	1274	600	Crooijmans, 2013	7758574	7764564	5990
chr15	18	738869	1275	600	Crooijmans, 2013	7758574	7776026	17452
chr15	18	744301	1276	600	Crooijmans, 2013	7758574	7781458	22884
chr15	19	778225	1277	601	Crooijmans, 2013	7896151	7930075	33924
chr15	20	804157	1278	602	Crooijmans, 2013	7974599	8000531	25932
chr15	20	824128	1279	602	Crooijmans, 2013	7981720	8020502	38782
chr15	20	824128	1280	602	Crooijmans, 2013	7988519	8006986	18467
chr15	20	824128	1281	602	Crooijmans, 2013	7988519	8010355	21836
chr15	20	824128	1282	602	Crooijmans, 2013	7988519	8014495	25976
chr15	20	824128	1283	602	Crooijmans, 2013	7988519	8020502	31983
chr15	20	824128	1284	602	Crooijmans, 2013	7992630	8000531	7901
chr15	20	824128	1285	602	Crooijmans, 2013	7992630	8010355	17725
chr15	20	824128	1286	602	Crooijmans, 2013	7992630	8014495	21865
chr15	20	824128	1287	602	Crooijmans, 2013	7992630	8020502	27872
chr15	20	824128	1288	602	Crooijmans, 2013	7996533	8014495	17962
chr15	21	850233	1289	603	Crooijmans, 2013	9389114	9415219	26105
chr15	21	861619	1290	603	Crooijmans, 2013	9405343	9426605	21262
chr15	21	875877	1291	603	Crooijmans, 2013	9405343	9440863	35520
chr15	21	875877	1292	603	Crooijmans, 2013	9409184	9440863	31679
chr15	21	880974	1293	603	Crooijmans, 2013	9423273	9445960	22687
chr15	22	888596	1294	604	Crooijmans, 2013	9636288	9643910	7622
chr15	22	889919	1295	604	wang 2012	9636288	9645233	8945
chr15	22	892202	1296	604	Crooijmans, 2013	9636288	9647516	11228
chr15	22	897422	1297	604	Crooijmans, 2013	9636288	9652736	16448
chr15	23	922131	1298	605	Crooijmans, 2013	10143166	10167875	24709
chr15	24	963306	1299	606	Crooijmans, 2013	10232561	10273736	41175
chr15	24	963306	1300	606	Crooijmans, 2013	10238293	10273736	35443
chr15	24	969138	1301	606	Crooijmans, 2013	10238293	10279568	41275
chr15	25	1016978	1302	607	Crooijmans, 2013	10728574	10776414	47840
chr15	26	1022178	1303	608	Fan 2013	10838101	10843301	5201
chr15	27	1037178	1304	609	Luo 2013	11013750	11028750	15000
chr15	27	1056380	1305	609	Crooijmans, 2013	11023701	11047952	24251
chr15	28	1084781	1306	610	Crooijmans, 2013	11169800	11198201	28401
chr15	28	1084781	1307	610	Crooijmans, 2013	11180122	11198201	18079
chr15	29	1136147	1308	611	Crooijmans, 2013	11261122	11312488	51366
chr15	30	1141347	1309	612	Fan 2013	11378381	11383581	5201
chr15	31	1169940	1310	613	Crooijmans, 2013	11488671	11517264	28593
chr15	31	1169940	1311	613	Crooijmans, 2013	11491511	11517264	25753
chr15	32	1200422	1312	614	Crooijmans, 2013	11544299	11574781	30482
chr15	33	1205622	1313	615	Fan 2013	12514581	12519781	5201
chr15	34	1210822	1314	616	Fan 2013	12526541	12531741	5201
chr15	35	1551252	1315	617	Crooijmans, 2013	12622535	12962965	340430
chr15	35	1551252	1316	617	Fan 2013	12626901	12632101	5201
chr15	35	1551252	1317	617	wang2010	12662602	12667886	5284
chr15	35	1551252	1318	617	Crooijmans, 2013	12701204	12962965	261761
chr15	35	1551252	1319	617	Crooijmans, 2013	12704046	12962965	258919
chr15	35	1551252	1320	617	Crooijmans, 2013	12713443	12962965	249522
chr15	35	1551252	1321	617	Crooijmans, 2013	12750257	12962965	212708
chr15	35	1551252	1322	617	Fan 2013	12872341	12881701	9361
chr16	1	35875	1323	618	Crooijmans, 2013	73	35948	35875
chr16	1	168444	1324	618	Crooijmans, 2013	73	168517	168444
chr16	1	191403	1325	618	Crooijmans, 2013	73	191476	191403
chr16	1	199340	1326	618	Crooijmans, 2013	73	199413	199340
chr16	1	218083	1327	618	Crooijmans, 2013	73	218156	218083
chr16	1	225679	1328	618	Crooijmans, 2013	73	225752	225679
chr16	1	230552	1329	618	Crooijmans, 2013	73	230625	230552
chr16	1	429352	1330	618	Crooijmans, 2013	73	429425	429352
chr16	1	429352	1331	618	wang2010	352	247972	247620
chr16	1	432778	1332	618	wang2010	352	432851	432499
chr16	1	432778	1333	618	Crooijmans, 2013	14345	191476	177131
chr16	1	432778	1334	618	Crooijmans, 2013	14345	199413	185068
chr16	1	432778	1335	618	Crooijmans, 2013	14345	213419	199074
chr16	1	432778	1336	618	Crooijmans, 2013	18048	187325	169277
chr16	1	432778	1337	618	Fan 2013	23661	28861	5201
chr16	1	432778	1338	618	Crooijmans, 2013	25335	35948	10613
chr16	1	432778	1339	618	Crooijmans, 2013	148954	199413	50459
chr16	1	432778	1340	618	Crooijmans, 2013	160029	207696	47667
chr16	1	432778	1341	618	Fan 2013	162501	168221	5721
chr16	1	432778	1342	618	Crooijmans, 2013	168458	199413	30955
chr16	1	432778	1343	618	Crooijmans, 2013	168458	247634	79176
chr16	1	432778	1344	618	Crooijmans, 2013	172339	199413	27074
chr16	1	432778	1345	618	Crooijmans, 2013	172339	207696	35357
chr16	1	432778	1346	618	Crooijmans, 2013	187275	199413	12138
chr16	1	432778	1347	618	Crooijmans, 2013	187275	225752	38477
chr16	1	432778	1348	618	Crooijmans, 2013	187275	247634	60359
chr16	1	432778	1349	618	Crooijmans, 2013	187275	253947	66672
chr16	1	432778	1350	618	Fan 2013	194741	203061	8321
chr16	1	432778	1351	618	wang 2012	195332	203845	8513
chr16	1	432778	1352	618	wang 2012	195332	207696	12364
chr16	1	432778	1353	618	wang 2012	195332	214765	19433
chr16	1	432778	1354	618	Crooijmans, 2013	199354	218156	18802
chr16	1	432778	1355	618	Crooijmans, 2013	199354	413902	214548
chr16	1	432778	1356	618	wang2010	200114	212934	12820
chr16	1	432778	1356	618	wang2010	200114	212934	12820
chr16	1	432778	1357	618	Crooijmans, 2013	204655	218156	13501
chr16	1	432778	1358	618	Crooijmans, 2013	204655	230625	25970
chr16	1	432778	1359	618	Crooijmans, 2013	204655	235094	30439
chr16	1	432778	1360	618	Crooijmans, 2013	204655	365879	161224
chr16	1	432778	1361	618	Crooijmans, 2013	204655	409885	205230
chr16	1	432778	1362	618	Crooijmans, 2013	204655	413902	209247
chr16	1	432778	1363	618	Crooijmans, 2013	204655	423174	218519
chr16	1	432778	1364	618	Crooijmans, 2013	204655	429425	224770
chr16	1	432778	1365	618	Crooijmans, 2013	213360	413902	200542
chr16	1	432778	1366	618	wang2010	217747	247972	30225
chr16	1	432778	1367	618	Crooijmans, 2013	218097	413902	195805
chr16	1	432778	1368	618	wang 2012	223174	247634	24460
chr16	1	432778	1369	618	wang 2012	223174	311357	88183
chr16	1	432778	1370	618	wang 2012	224617	247634	23017
chr16	1	432778	1371	618	wang 2012	224617	342967	118350
chr16	1	432778	1372	618	Crooijmans, 2013	225693	241940	16247
chr16	1	432778	1373	618	Crooijmans, 2013	238749	253947	15198
chr16	1	432778	1374	618	Crooijmans, 2013	241892	253947	12055
chr16	1	432778	1375	618	Crooijmans, 2013	241892	413902	172010
chr16	1	432778	1376	618	wang 2012	247575	253893	6318
chr16	1	432778	1377	618	wang 2012	253947	342967	89020
chr16	1	432778	1378	618	Crooijmans, 2013	258907	365879	106972
chr16	1	432778	1379	618	Crooijmans, 2013	258907	405778	146871
chr16	1	432778	1380	618	Crooijmans, 2013	258907	413902	154995
chr16	1	432778	1381	618	Crooijmans, 2013	258907	419199	160292
chr16	1	432778	1382	618	wang2010	270019	432851	162832
chr16	1	432778	1382	618	wang2010	270019	432851	162832
chr16	1	432778	1382	618	Luo 2013	270019	432851	162832
chr16	1	432778	1382	618	Luo 2013	270019	432851	162832
chr16	1	432778	1382	618	Luo 2013	270019	432851	162832
chr16	1	432778	1383	618	Luo 2013	272885	432851	159966
chr16	1	432778	1383	618	Luo 2013	272885	432851	159966
chr16	1	432778	1384	618	Luo 2013	273750	430175	156425
chr16	1	432778	1385	618	Crooijmans, 2013	280486	352976	72490
chr16	1	432778	1386	618	Crooijmans, 2013	280486	365879	85393
chr16	1	432778	1387	618	Crooijmans, 2013	280486	413902	133416
chr16	1	432778	1388	618	Crooijmans, 2013	315862	405778	89916
chr16	1	432778	1389	618	Fan 2013	319021	328901	9881
chr16	1	432778	1390	618	Crooijmans, 2013	343942	413902	69960
chr16	1	432778	1391	618	Crooijmans, 2013	365820	409885	44065
chr16	1	432778	1392	618	Crooijmans, 2013	375603	409885	34282
chr16	1	432778	1393	618	Fan 2013	394941	400141	5201
chr16	1	432778	1394	618	Crooijmans, 2013	398322	413902	15580
chr16	1	432778	1395	618	Fan 2013	419381	424581	5201
chr17	1	30468	1396	619	Crooijmans, 2013	502335	532803	30468
chr17	1	58196	1397	619	Crooijmans, 2013	502335	560531	58196
chr17	1	70815	1398	619	Crooijmans, 2013	502335	573150	70815
chr17	1	70815	1399	619	Crooijmans, 2013	532759	573150	40391
chr17	1	140614	1400	619	Crooijmans, 2013	543207	642949	99742
chr17	1	140614	1401	619	wang2010	567532	575349	7817
chr17	1	140614	1402	619	wang2010	567532	625422	57890
chr17	2	160632	1403	620	Crooijmans, 2013	1036860	1056878	20018
chr17	2	171954	1404	620	Crooijmans, 2013	1036860	1068200	31340
chr17	3	198403	1405	621	wang 2012	1286050	1312499	26449
chr17	3	198403	1405	621	wang 2012	1286050	1312499	26449
chr17	4	218912	1406	622	Crooijmans, 2013	1364257	1384766	20509
chr17	5	227123	1407	623	Crooijmans, 2013	1440435	1448646	8211
chr17	5	230499	1408	623	Crooijmans, 2013	1440435	1452022	11587
chr17	5	244723	1409	623	Crooijmans, 2013	1440435	1466246	25811
chr17	6	257060	1410	624	Crooijmans, 2013	1547877	1560214	12337
chr17	6	260135	1411	624	Crooijmans, 2013	1547877	1563289	15412
chr17	6	263497	1412	624	Crooijmans, 2013	1547877	1566651	18774
chr17	7	292454	1413	625	Crooijmans, 2013	2887402	2916359	28957
chr17	8	309117	1414	626	Crooijmans, 2013	4847243	4863906	16663
chr17	8	309117	1415	626	Fan 2013	4855501	4860701	5201
chr17	8	309117	1416	626	Crooijmans, 2013	4856019	4863906	7887
chr17	9	338767	1417	627	Crooijmans, 2013	5260692	5290342	29650
chr17	10	343967	1418	628	Fan 2013	5424381	5429581	5201
chr17	11	376124	1419	629	Crooijmans, 2013	5463166	5495323	32157
chr17	11	379147	1420	629	Crooijmans, 2013	5463166	5498346	35180
chr17	12	384347	1421	630	Fan 2013	5569981	5575181	5201
chr17	13	414729	1422	631	Crooijmans, 2013	5953218	5983600	30382
chr17	13	414729	1423	631	Crooijmans, 2013	5956594	5983600	27006
chr17	13	424787	1424	631	Crooijmans, 2013	5956594	5993658	37064
chr17	14	455548	1425	632	Crooijmans, 2013	6551380	6582141	30761
chr17	15	480789	1426	633	Crooijmans, 2013	6794389	6819630	25241
chr17	16	498019	1427	634	Crooijmans, 2013	7348345	7365575	17230
chr17	17	530651	1428	635	Crooijmans, 2013	8525781	8558413	32632
chr17	17	530651	1429	635	Crooijmans, 2013	8532228	8550356	18128
chr17	17	530651	1430	635	Crooijmans, 2013	8532228	8558413	26185
chr17	17	533808	1431	635	Crooijmans, 2013	8532228	8561570	29342
chr17	17	536366	1432	635	Crooijmans, 2013	8532228	8564128	31900
chr17	17	536366	1433	635	Crooijmans, 2013	8538786	8558413	19627
chr17	18	541566	1434	636	Fan 2013	8832981	8838181	5201
chr17	19	559228	1435	637	Crooijmans, 2013	8870557	8888219	17662
chr17	20	582477	1436	638	Crooijmans, 2013	9291729	9314978	23249
chr17	21	610075	1437	639	Crooijmans, 2013	9612896	9640494	27598
chr17	22	719234	1438	640	wang 2012	11070879	11180038	109159
chr17	22	719234	1439	640	wang 2012	11119775	11180038	60263
chr18	1	223222	1440	641	Crooijmans, 2013	457	223679	223222
chr18	2	248726	1441	642	Crooijmans, 2013	372390	397894	25504
chr18	2	251321	1442	642	Crooijmans, 2013	372390	400489	28099
chr18	2	251321	1443	642	Crooijmans, 2013	375984	397894	21910
chr18	2	251321	1444	642	Crooijmans, 2013	375984	400489	24505
chr18	3	284117	1445	643	Crooijmans, 2013	428697	461493	32796
chr18	4	312259	1446	644	Crooijmans, 2013	561722	589864	28142
chr18	4	317557	1447	644	Crooijmans, 2013	561722	595162	33440
chr18	5	329936	1448	645	Crooijmans, 2013	635215	647594	12379
chr18	5	351178	1449	645	Crooijmans, 2013	635215	668836	33621
chr18	6	367979	1450	646	Crooijmans, 2013	1798892	1815693	16801
chr18	6	370835	1451	646	Crooijmans, 2013	1798892	1818549	19657
chr18	6	377140	1452	646	Crooijmans, 2013	1798892	1824854	25962
chr18	6	412269	1453	646	Crooijmans, 2013	1798892	1859983	61091
chr18	6	412269	1454	646	Crooijmans, 2013	1807384	1815693	8309
chr18	6	412269	1455	646	Crooijmans, 2013	1807384	1824854	17470
chr18	6	412269	1456	646	Crooijmans, 2013	1812187	1824854	12667
chr18	6	412269	1457	646	Crooijmans, 2013	1812187	1845145	32958
chr18	6	413610	1458	646	wang 2012	1812187	1861324	49137
chr18	6	413610	1459	646	Crooijmans, 2013	1818495	1856658	38163
chr18	6	413610	1460	646	Crooijmans, 2013	1824795	1839547	14752
chr18	6	413610	1461	646	Crooijmans, 2013	1824795	1859983	35188
chr18	6	431979	1462	646	Crooijmans, 2013	1824795	1879693	54898
chr18	6	431979	1463	646	Crooijmans, 2013	1827990	1839547	11557
chr18	6	431979	1464	646	Crooijmans, 2013	1827990	1856658	28668
chr18	6	431979	1465	646	Crooijmans, 2013	1833647	1856658	23011
chr18	7	453739	1466	647	Crooijmans, 2013	1883004	1904764	21760
chr18	7	453739	1467	647	Crooijmans, 2013	1888573	1904764	16191
chr18	8	483635	1468	648	Crooijmans, 2013	2134461	2164357	29896
chr18	9	507041	1469	649	Crooijmans, 2013	2216112	2239518	23406
chr18	10	516991	1470	650	Luo 2013	2340193	2350143	9950
chr18	11	1616986	1471	651	wang2010	3735368	4835363	1099995
chr18	11	1616986	1472	651	Crooijmans, 2013	3843730	3874553	30823
chr18	11	1616986	1473	651	Crooijmans, 2013	3843730	3879058	35328
chr18	11	1616986	1474	651	wang2010	3877618	4822958	945340
chr18	11	1616986	1475	651	Crooijmans, 2013	4386819	4421952	35133
chr18	11	1616986	1476	651	Crooijmans, 2013	4607433	4628894	21461
chr18	11	1616986	1477	651	Crooijmans, 2013	4710802	4729679	18877
chr18	12	1640310	1478	652	Crooijmans, 2013	7353263	7376587	23324
chr18	13	1673860	1479	653	Crooijmans, 2013	7891670	7925220	33550
chr18	14	1701064	1480	654	wang2010	8667850	8695054	27204
chr18	15	1721834	1481	655	Crooijmans, 2013	8939279	8960049	20770
chr18	16	1743280	1482	656	Crooijmans, 2013	9753695	9775141	21446
chr19	1	18031	1483	657	Crooijmans, 2013	1311	19342	18031
chr19	1	20677	1484	657	Crooijmans, 2013	1311	21988	20677
chr19	2	44727	1485	658	Crooijmans, 2013	188218	212268	24050
chr19	3	73691	1486	659	Crooijmans, 2013	825525	854489	28964
chr19	4	96106	1487	660	Crooijmans, 2013	2376466	2398881	22415
chr19	5	146106	1488	661	Luo 2013	2618750	2668750	50000
chr19	5	146106	1489	661	Luo 2013	2621250	2666250	45000
chr19	6	173933	1490	662	Crooijmans, 2013	3148203	3176030	27827
chr19	7	219589	1491	663	Crooijmans, 2013	3366703	3412359	45656
chr19	8	244575	1492	664	Crooijmans, 2013	3959078	3984064	24986
chr19	9	260348	1493	665	Crooijmans, 2013	4767803	4783576	15773
chr19	10	291122	1494	666	Crooijmans, 2013	5184355	5215129	30774
chr19	11	316160	1495	667	Crooijmans, 2013	5850436	5875474	25038
chr19	12	350844	1496	668	Crooijmans, 2013	6022119	6056803	34684
chr19	12	353343	1497	668	Crooijmans, 2013	6034943	6059302	24359
chr19	13	380431	1498	669	Crooijmans, 2013	6423203	6450291	27088
chr19	14	387372	1499	670	Crooijmans, 2013	7132903	7139844	6941
chr19	15	434978	1500	671	Crooijmans, 2013	7543217	7590823	47606
chr19	15	434978	1501	671	Crooijmans, 2013	7547060	7587795	40735
chr19	15	434978	1502	671	Fan 2013	7561061	7568861	7801
chr19	16	524800	1503	672	wang 2012	9845237	9935059	89822
chr19	16	524800	1504	672	wang 2012	9846597	9935059	88462
chr2	1	7167	1505	673	Crooijmans, 2013	678825	685992	7167
chr2	2	81267	1506	674	Crooijmans, 2013	792427	866527	74100
chr2	2	81267	1507	674	Fan 2013	800541	805741	5201
chr2	2	81267	1508	674	Crooijmans, 2013	816708	863962	47254
chr2	2	81267	1509	674	Crooijmans, 2013	826131	844004	17873
chr2	2	81267	1510	674	Crooijmans, 2013	826131	847113	20982
chr2	2	81267	1511	674	Crooijmans, 2013	826131	851704	25573
chr2	2	81267	1512	674	Crooijmans, 2013	826131	854454	28323
chr2	2	81267	1513	674	Crooijmans, 2013	826131	860544	34413
chr2	2	81267	1514	674	Crooijmans, 2013	826131	863962	37831
chr2	2	81267	1515	674	Crooijmans, 2013	826131	866527	40396
chr2	2	90458	1516	674	Crooijmans, 2013	826131	875718	49587
chr2	2	147085	1517	674	Crooijmans, 2013	826131	932345	106214
chr2	2	147085	1518	674	Fan 2013	829141	834861	5721
chr2	2	147085	1519	674	Crooijmans, 2013	832208	844004	11796
chr2	2	147085	1520	674	Crooijmans, 2013	832208	854454	22246
chr2	2	147085	1521	674	Crooijmans, 2013	832208	863962	31754
chr2	2	147085	1522	674	Crooijmans, 2013	832208	932345	100137
chr2	2	147085	1523	674	wang2010	835192	877649	42457
chr2	3	179193	1524	675	Crooijmans, 2013	1115685	1147793	32108
chr2	4	215516	1525	676	Crooijmans, 2013	2462593	2498916	36323
chr2	4	215516	1526	676	Crooijmans, 2013	2466637	2498916	32279
chr2	5	244044	1527	677	Crooijmans, 2013	5585535	5614063	28528
chr2	5	244044	1528	677	Crooijmans, 2013	5596539	5609914	13375
chr2	5	244044	1529	677	Crooijmans, 2013	5596539	5614063	17524
chr2	6	271111	1530	678	Crooijmans, 2013	6195613	6222680	27067
chr2	7	308318	1531	679	Crooijmans, 2013	7177096	7214303	37207
chr2	7	308318	1532	679	wang 2012	7199478	7211269	11791
chr2	8	338829	1533	680	Crooijmans, 2013	7255241	7285752	30511
chr2	8	342296	1534	680	Crooijmans, 2013	7282627	7289219	6592
chr2	8	361590	1535	680	Crooijmans, 2013	7282627	7308513	25886
chr2	8	374690	1536	680	Crooijmans, 2013	7303367	7321613	18246
chr2	9	383475	1537	681	Crooijmans, 2013	7386786	7395571	8785
chr2	10	403295	1538	682	Crooijmans, 2013	7543226	7563046	19820
chr2	11	425225	1539	683	Crooijmans, 2013	7683568	7705498	21930
chr2	11	438001	1540	683	Crooijmans, 2013	7686170	7718274	32104
chr2	11	443534	1541	683	Crooijmans, 2013	7693000	7723807	30807
chr2	12	502424	1542	684	Crooijmans, 2013	7755024	7813914	58890
chr2	13	509184	1543	685	Fan 2013	7818981	7825741	6761
chr2	14	533292	1544	686	Crooijmans, 2013	8264922	8289030	24108
chr2	15	539532	1545	687	Fan 2013	8487181	8493421	6241
chr2	16	565058	1546	688	Crooijmans, 2013	9250996	9276522	25526
chr2	16	565058	1547	688	Crooijmans, 2013	9259172	9276522	17350
chr2	17	578906	1548	689	Crooijmans, 2013	9513714	9527562	13848
chr2	18	617960	1549	690	Crooijmans, 2013	9757658	9796712	39054
chr2	18	617960	1550	690	Crooijmans, 2013	9765563	9779565	14002
chr2	19	631578	1551	691	Crooijmans, 2013	10807421	10821039	13618
chr2	20	640008	1552	692	Crooijmans, 2013	10964865	10973295	8430
chr2	21	651183	1553	693	wang 2012	11851288	11862463	11175
chr2	22	697850	1554	694	Crooijmans, 2013	11909738	11956405	46667
chr2	23	717817	1555	695	wang 2012	12385227	12405194	19967
chr2	23	717817	1556	695	wang 2012	12388597	12405194	16597
chr2	23	717817	1556	695	wang 2012	12388597	12405194	16597
chr2	23	717817	1556	695	wang 2012	12388597	12405194	16597
chr2	23	717817	1556	695	wang 2012	12388597	12405194	16597
chr2	23	720304	1557	695	wang 2012	12388597	12407681	19084
chr2	24	770943	1558	696	Crooijmans, 2013	12934329	12984968	50639
chr2	25	797097	1559	697	Crooijmans, 2013	13859447	13885601	26154
chr2	26	826442	1560	698	Crooijmans, 2013	14045699	14075044	29345
chr2	27	842564	1561	699	Crooijmans, 2013	14157170	14173292	16122
chr2	27	870980	1562	699	Crooijmans, 2013	14157170	14201708	44538
chr2	28	900037	1563	700	Crooijmans, 2013	14723374	14752431	29057
chr2	29	911329	1564	701	Crooijmans, 2013	15849634	15860926	11292
chr2	30	931529	1565	702	wang2010	16847598	16867798	20200
chr2	31	938464	1566	703	Crooijmans, 2013	17324500	17331435	6935
chr2	32	970589	1567	704	Crooijmans, 2013	18644014	18676139	32125
chr2	33	1000870	1568	705	Crooijmans, 2013	19983858	20014139	30281
chr2	34	1034494	1569	706	Crooijmans, 2013	20317138	20350762	33624
chr2	35	1052205	1570	707	wang2010	21322605	21340316	17711
chr2	36	1066769	1571	708	Crooijmans, 2013	21764872	21779436	14564
chr2	36	1066769	1572	708	Crooijmans, 2013	21770000	21779436	9436
chr2	36	1072509	1573	708	Crooijmans, 2013	21770000	21785176	15176
chr2	37	1089490	1574	709	Crooijmans, 2013	23404586	23421567	16981
chr2	38	1095210	1575	710	Fan 2013	24405421	24411141	5721
chr2	39	1110494	1576	711	Crooijmans, 2013	24695436	24710720	15284
chr2	39	1110494	1577	711	Crooijmans, 2013	24700126	24710720	10594
chr2	40	1163128	1578	712	Crooijmans, 2013	24724743	24777377	52634
chr2	41	1270585	1579	713	wang2010	25695439	25802896	107457
chr2	42	1283236	1580	714	Crooijmans, 2013	27348444	27361095	12651
chr2	43	1309108	1581	715	Crooijmans, 2013	27581820	27607692	25872
chr2	44	1322676	1582	716	Crooijmans, 2013	30901724	30915292	13568
chr2	44	1336782	1583	716	Crooijmans, 2013	30901724	30929398	27674
chr2	44	1372646	1584	716	Crooijmans, 2013	30901724	30965262	63538
chr2	45	1393527	1585	717	Crooijmans, 2013	31024367	31045248	20881
chr2	46	1406509	1586	718	Crooijmans, 2013	31247850	31260832	12982
chr2	47	1422445	1587	719	Crooijmans, 2013	31529391	31545327	15936
chr2	48	1459897	1588	720	Crooijmans, 2013	31720252	31757704	37452
chr2	49	1468721	1589	721	Crooijmans, 2013	32022541	32031365	8824
chr2	50	1492900	1590	722	Crooijmans, 2013	33008648	33032827	24179
chr2	50	1502645	1591	722	Crooijmans, 2013	33023183	33042572	19389
chr2	51	1522636	1592	723	Crooijmans, 2013	34564806	34584797	19991
chr2	52	1541676	1593	724	Crooijmans, 2013	34899418	34918458	19040
chr2	52	1544728	1594	724	Crooijmans, 2013	34899418	34921510	22092
chr2	53	1561632	1595	725	Crooijmans, 2013	35732048	35748952	16904
chr2	53	1561632	1596	725	Crooijmans, 2013	35732057	35748952	16895
chr2	53	1568977	1597	725	Crooijmans, 2013	35732057	35756297	24240
chr2	53	1572925	1598	725	Crooijmans, 2013	35732057	35760245	28188
chr2	53	1603196	1599	725	Crooijmans, 2013	35732057	35790516	58459
chr2	54	1611516	1600	726	Fan 2013	36212021	36220341	8321
chr2	55	1622758	1601	727	wang 2012	36499780	36511022	11242
chr2	55	1622758	1601	727	wang 2012	36499780	36511022	11242
chr2	55	1622758	1602	727	Crooijmans, 2013	36501184	36511022	9838
chr2	56	1650379	1603	728	wang2010	37125152	37152773	27621
chr2	57	1678234	1604	729	Crooijmans, 2013	38240434	38268289	27855
chr2	58	1718167	1605	730	wang2010	40647961	40687894	39933
chr2	58	1718167	1606	730	Crooijmans, 2013	40649688	40657983	8295
chr2	58	1718167	1607	730	Crooijmans, 2013	40654695	40675515	20820
chr2	58	1718167	1608	730	Fan 2013	40655941	40665821	9881
chr2	58	1718167	1609	730	Luo 2013	40660120	40677934	17814
chr2	58	1718167	1610	730	Luo 2013	40661250	40676250	15000
chr2	58	1718167	1611	730	wang2010	40662570	40677934	15364
chr2	58	1718167	1612	730	Fan 2013	40666861	40677261	10401
chr2	59	1774383	1613	731	Crooijmans, 2013	41414727	41470943	56216
chr2	59	1774383	1614	731	Fan 2013	41418261	41424501	6241
chr2	59	1774383	1615	731	Crooijmans, 2013	41419926	41440007	20081
chr2	59	1774383	1616	731	Crooijmans, 2013	41419926	41470943	51017
chr2	60	1830074	1617	732	Crooijmans, 2013	41756218	41811909	55691
chr2	61	1854031	1618	733	Crooijmans, 2013	43851094	43875051	23957
chr2	62	1879720	1619	734	Crooijmans, 2013	44746072	44771761	25689
chr2	63	1900806	1620	735	Crooijmans, 2013	46235002	46256088	21086
chr2	64	1924646	1621	736	Crooijmans, 2013	46801442	46825282	23840
chr2	64	1929804	1622	736	Crooijmans, 2013	46801442	46830440	28998
chr2	65	1953820	1623	737	Crooijmans, 2013	47344181	47368197	24016
chr2	66	2004402	1624	738	Crooijmans, 2013	48156765	48207347	50582
chr2	66	2004402	1625	738	Crooijmans, 2013	48193972	48207347	13375
chr2	67	2012001	1626	739	Crooijmans, 2013	48410181	48417780	7599
chr2	68	2029484	1627	740	wang2010	48765034	48782517	17483
chr2	69	2092061	1628	741	Luo 2013	49165364	49227941	62577
chr2	69	2092061	1629	741	Fan 2013	49168341	49174061	5721
chr2	69	2092061	1630	741	Luo 2013	49168750	49218750	50000
chr2	69	2092061	1631	741	Crooijmans, 2013	49173046	49204928	31882
chr2	69	2092061	1632	741	Crooijmans, 2013	49173046	49223891	50845
chr2	69	2095558	1633	741	Crooijmans, 2013	49173046	49231438	58392
chr2	69	2128728	1634	741	Crooijmans, 2013	49173046	49264608	91562
chr2	69	2128728	1635	741	Crooijmans, 2013	49177325	49231438	54113
chr2	69	2128728	1636	741	Luo 2013	49181250	49218750	37500
chr2	69	2128728	1637	741	Luo 2013	49181250	49226250	45000
chr2	69	2128728	1638	741	Crooijmans, 2013	49183436	49231438	48002
chr2	69	2128728	1639	741	Crooijmans, 2013	49189448	49204928	15480
chr2	69	2128728	1640	741	Crooijmans, 2013	49194742	49204928	10186
chr2	69	2128728	1641	741	Fan 2013	49210461	49216701	6241
chr2	69	2128728	1642	741	Fan 2013	49218261	49230221	11961
chr2	69	2139286	1643	741	Crooijmans, 2013	49242530	49275166	32636
chr2	69	2139286	1644	741	Crooijmans, 2013	49250505	49275166	24661
chr2	70	2190276	1645	742	Crooijmans, 2013	52224364	52275354	50990
chr2	70	2193437	1646	742	Crooijmans, 2013	52224364	52278515	54151
chr2	71	2211216	1647	743	wang 2012	53827173	53844952	17779
chr2	71	2213383	1648	743	Crooijmans, 2013	53827173	53847119	19946
chr2	72	2242123	1649	744	wang 2012	54106773	54135513	28740
chr2	72	2242123	1650	744	wang2010	54120143	54135353	15210
chr2	73	2262863	1651	745	Crooijmans, 2013	54396213	54416953	20740
chr2	74	2327447	1652	746	Crooijmans, 2013	54533299	54597883	64584
chr2	74	2327447	1653	746	Crooijmans, 2013	54559293	54583554	24261
chr2	74	2339131	1654	746	Crooijmans, 2013	54559293	54609567	50274
chr2	74	2339131	1655	746	Crooijmans, 2013	54562316	54583554	21238
chr2	74	2339131	1656	746	Crooijmans, 2013	54569091	54583554	14463
chr2	75	2392278	1657	747	Crooijmans, 2013	55096095	55149242	53147
chr2	75	2392278	1658	747	Fan 2013	55122341	55129621	7281
chr2	76	2419528	1659	748	Crooijmans, 2013	56022478	56049728	27250
chr2	77	2434718	1660	749	wang 2012	56108191	56123381	15190
chr2	78	2441998	1661	750	Fan 2013	56161821	56169101	7281
chr2	79	2468375	1662	751	Crooijmans, 2013	56514078	56540455	26377
chr2	79	2468375	1663	751	Crooijmans, 2013	56524337	56540455	16118
chr2	79	2471425	1664	751	wang 2012	56531888	56543505	11617
chr2	80	2478899	1665	752	Crooijmans, 2013	56713917	56721391	7474
chr2	81	2500128	1666	753	Crooijmans, 2013	56746329	56767558	21229
chr2	82	2524200	1667	754	Crooijmans, 2013	57980119	58004191	24072
chr2	82	2524200	1668	754	Crooijmans, 2013	57982766	58004191	21425
chr2	82	2539768	1669	754	Crooijmans, 2013	57982766	58019759	36993
chr2	83	2597255	1670	755	Crooijmans, 2013	58818016	58875503	57487
chr2	83	2597255	1671	755	Crooijmans, 2013	58841359	58863471	22112
chr2	83	2597255	1672	755	Crooijmans, 2013	58841359	58871847	30488
chr2	83	2597255	1673	755	Crooijmans, 2013	58841359	58875503	34144
chr2	83	2606488	1674	755	Crooijmans, 2013	58841359	58884736	43377
chr2	83	2625516	1675	755	Crooijmans, 2013	58841359	58903764	62405
chr2	83	2632629	1676	755	Crooijmans, 2013	58841359	58910877	69518
chr2	83	2632629	1677	755	Crooijmans, 2013	58845624	58884736	39112
chr2	83	2632629	1678	755	Crooijmans, 2013	58849687	58884736	35049
chr2	83	2632629	1679	755	Crooijmans, 2013	58854820	58871847	17027
chr2	83	2632629	1680	755	Crooijmans, 2013	58854820	58875503	20683
chr2	83	2632629	1681	755	Crooijmans, 2013	58854820	58877994	23174
chr2	83	2632629	1682	755	Crooijmans, 2013	58859884	58875503	15619
chr2	83	2632629	1683	755	Crooijmans, 2013	58863412	58875503	12091
chr2	83	2632629	1684	755	Crooijmans, 2013	58863412	58877994	14582
chr2	83	2632629	1685	755	Crooijmans, 2013	58867407	58877994	10587
chr2	84	2656995	1686	756	Crooijmans, 2013	59006784	59031150	24366
chr2	85	2692945	1687	757	Crooijmans, 2013	59452886	59488836	35950
chr2	85	2692945	1688	757	Crooijmans, 2013	59475840	59488836	12996
chr2	86	2704450	1689	758	Crooijmans, 2013	60559286	60570791	11505
chr2	86	2724342	1690	758	Crooijmans, 2013	60559286	60590683	31397
chr2	87	2731778	1691	759	Crooijmans, 2013	60641422	60648858	7436
chr2	87	2735461	1692	759	Fan 2013	60646301	60652541	6241
chr2	88	2764610	1693	760	Crooijmans, 2013	61616467	61645616	29149
chr2	88	2776547	1694	760	Crooijmans, 2013	61631275	61657553	26278
chr2	88	2776547	1695	760	Crooijmans, 2013	61634475	61657553	23078
chr2	89	2813118	1696	761	Crooijmans, 2013	62117420	62153991	36571
chr2	90	2854346	1697	762	Crooijmans, 2013	62441210	62482438	41228
chr2	91	2873700	1698	763	Crooijmans, 2013	64374589	64393943	19354
chr2	91	2881419	1699	763	Crooijmans, 2013	64374589	64401662	27073
chr2	91	2881419	1700	763	Crooijmans, 2013	64383150	64401662	18512
chr2	91	2886074	1701	763	Crooijmans, 2013	64383150	64406317	23167
chr2	92	2892834	1702	764	Fan 2013	64440221	64446981	6761
chr2	93	2916072	1703	765	Crooijmans, 2013	64895791	64919029	23238
chr2	94	2939012	1704	766	Crooijmans, 2013	64984009	65006949	22940
chr2	95	2960933	1705	767	Crooijmans, 2013	65356497	65378418	21921
chr2	96	2993677	1706	768	Crooijmans, 2013	65464848	65497592	32744
chr2	96	2993677	1707	768	Crooijmans, 2013	65468450	65492296	23846
chr2	96	2993677	1708	768	Crooijmans, 2013	65473202	65497592	24390
chr2	97	3001776	1709	769	Crooijmans, 2013	66498103	66506202	8099
chr2	97	3011060	1710	769	Crooijmans, 2013	66498103	66515486	17383
chr2	98	3017997	1711	770	Crooijmans, 2013	66636109	66643046	6937
chr2	99	3038449	1712	771	Crooijmans, 2013	66965893	66986345	20452
chr2	100	3043649	1713	772	Fan 2013	68202421	68207621	5201
chr2	101	3051137	1714	773	Crooijmans, 2013	68340062	68347550	7488
chr2	102	3063287	1715	774	wang2010	68710479	68722629	12150
chr2	103	3070623	1716	775	Crooijmans, 2013	68749743	68757079	7336
chr2	103	3077024	1717	775	Crooijmans, 2013	68749743	68763480	13737
chr2	103	3081296	1718	775	Luo 2013	68752514	68767752	15238
chr2	104	3088526	1719	776	Crooijmans, 2013	68829938	68837168	7230
chr2	105	3120100	1720	777	Crooijmans, 2013	68842138	68873712	31574
chr2	105	3120100	1721	777	Crooijmans, 2013	68845685	68873712	28027
chr2	106	3138718	1722	778	Crooijmans, 2013	69535786	69554404	18618
chr2	107	3145998	1723	779	Fan 2013	72995261	73002541	7281
chr2	108	3163177	1724	780	Crooijmans, 2013	73197344	73214523	17179
chr2	109	3182264	1725	781	wang 2012	73252349	73271436	19087
chr2	109	3183734	1726	781	wang 2012	73252349	73272906	20557
chr2	109	3193408	1727	781	wang2010	73252627	73282580	29953
chr2	109	3193408	1728	781	Crooijmans, 2013	73254523	73276973	22450
chr2	110	3205893	1729	782	wang2010	75180234	75192719	12485
chr2	111	3217550	1730	783	wang 2012	75571707	75583364	11657
chr2	112	3228470	1731	784	Fan 2013	75643101	75654021	10921
chr2	113	3236377	1732	785	Crooijmans, 2013	75987498	75995405	7907
chr2	113	3240871	1733	785	Crooijmans, 2013	75987498	75999899	12401
chr2	113	3240871	1734	785	Fan 2013	75990981	75997221	6241
chr2	113	3240871	1735	785	Crooijmans, 2013	75992369	75999899	7530
chr2	114	3258175	1736	786	wang2010	76015335	76032639	17304
chr2	115	3264935	1737	787	Fan 2013	76289981	76296741	6761
chr2	116	3272735	1738	788	Fan 2013	76528661	76536461	7801
chr2	116	3318956	1739	788	Crooijmans, 2013	76532765	76582682	49917
chr2	116	3318956	1740	788	Fan 2013	76536981	76542701	5721
chr2	116	3336642	1741	788	Crooijmans, 2013	76576552	76600368	23816
chr2	117	3342882	1742	789	Fan 2013	76639941	76646181	6241
chr2	118	3348602	1743	790	Fan 2013	77065301	77071021	5721
chr2	119	3354322	1744	791	Fan 2013	77073101	77078821	5721
chr2	120	3361339	1745	792	Crooijmans, 2013	77437834	77444851	7017
chr2	121	3426816	1746	793	Crooijmans, 2013	77633704	77699181	65477
chr2	121	3433211	1747	793	Crooijmans, 2013	77679105	77705576	26471
chr2	121	3454737	1748	793	Crooijmans, 2013	77699122	77727102	27980
chr2	122	3462017	1749	794	Fan 2013	77839581	77846861	7281
chr2	123	3492154	1750	795	Crooijmans, 2013	78126515	78156652	30137
chr2	123	3492154	1751	795	Crooijmans, 2013	78129302	78156652	27350
chr2	123	3492154	1752	795	Crooijmans, 2013	78146377	78156652	10275
chr2	124	3497874	1753	796	Fan 2013	78659621	78665341	5721
chr2	125	3532952	1754	797	Crooijmans, 2013	78793580	78828658	35078
chr2	126	3553002	1755	798	Crooijmans, 2013	79634323	79654373	20050
chr2	127	3558202	1756	799	Fan 2013	80658501	80663701	5201
chr2	128	3576882	1757	800	Crooijmans, 2013	80826389	80845069	18680
chr2	128	3587406	1758	800	Crooijmans, 2013	80826389	80855593	29204
chr2	128	3587406	1758	800	Crooijmans, 2013	80826389	80855593	29204
chr2	128	3593335	1759	800	Crooijmans, 2013	80826389	80861522	35133
chr2	129	3598535	1760	801	Fan 2013	80976741	80981941	5201
chr2	130	3621341	1761	802	Crooijmans, 2013	80997828	81020634	22806
chr2	131	3651248	1762	803	Crooijmans, 2013	81299874	81329781	29907
chr2	131	3651248	1763	803	Crooijmans, 2013	81306992	81329781	22789
chr2	132	3674527	1764	804	Crooijmans, 2013	81367134	81390413	23279
chr2	132	3674527	1765	804	Crooijmans, 2013	81371192	81390413	19221
chr2	132	3686591	1766	804	Crooijmans, 2013	81371192	81402477	31285
chr2	132	3686591	1767	804	Crooijmans, 2013	81374531	81390413	15882
chr2	133	3717731	1768	805	Crooijmans, 2013	81911111	81942251	31140
chr2	134	3728906	1769	806	Crooijmans, 2013	81966890	81978065	11175
chr2	135	3760975	1770	807	Crooijmans, 2013	82940764	82972833	32069
chr2	135	3773387	1771	807	Crooijmans, 2013	82949262	82985245	35983
chr2	136	3779627	1772	808	Fan 2013	83102501	83108741	6241
chr2	137	3785867	1773	809	Fan 2013	83118621	83124861	6241
chr2	138	3798867	1774	810	Fan 2013	84080621	84093621	13001
chr2	139	3805486	1775	811	Crooijmans, 2013	84198431	84205050	6619
chr2	139	3810386	1776	811	Crooijmans, 2013	84198431	84209950	11519
chr2	140	3836308	1777	812	Crooijmans, 2013	84267799	84293721	25922
chr2	141	3852987	1778	813	wang 2012	86319269	86335948	16679
chr2	141	3852987	1778	813	wang 2012	86319269	86335948	16679
chr2	141	3852987	1778	813	wang 2012	86319269	86335948	16679
chr2	141	3852987	1779	813	wang 2012	86323347	86335948	12601
chr2	141	3852987	1779	813	wang 2012	86323347	86335948	12601
chr2	141	3852987	1779	813	wang 2012	86323347	86335948	12601
chr2	141	3852987	1780	813	Crooijmans, 2013	86325219	86335948	10729
chr2	142	3860627	1781	814	Crooijmans, 2013	86566766	86574406	7640
chr2	143	3876788	1782	815	Crooijmans, 2013	87429293	87445454	16161
chr2	143	3881276	1783	815	Crooijmans, 2013	87429293	87449942	20649
chr2	144	3918688	1784	816	Crooijmans, 2013	87929869	87967281	37412
chr2	145	3956890	1785	817	Crooijmans, 2013	90243811	90282013	38202
chr2	146	4009564	1786	818	Crooijmans, 2013	90569620	90622294	52674
chr2	146	4024198	1787	818	Crooijmans, 2013	90588751	90636928	48177
chr2	146	4028552	1788	818	Crooijmans, 2013	90588751	90641282	52531
chr2	146	4028552	1789	818	Crooijmans, 2013	90599086	90622294	23208
chr2	146	4028552	1790	818	Crooijmans, 2013	90613510	90641282	27772
chr2	146	4028552	1791	818	Crooijmans, 2013	90619585	90641282	21697
chr2	147	4055995	1792	819	wang2010	92210486	92237929	27443
chr2	148	4088805	1793	820	Crooijmans, 2013	92968363	93001173	32810
chr2	149	4111685	1794	821	Crooijmans, 2013	93950240	93973120	22880
chr2	150	4144605	1795	822	Crooijmans, 2013	94195395	94228315	32920
chr2	150	4144605	1796	822	Crooijmans, 2013	94199898	94207602	7704
chr2	151	4150845	1797	823	Fan 2013	94413021	94419261	6241
chr2	152	4169100	1798	824	wang 2012	94629618	94647873	18255
chr2	153	4177398	1799	825	wang 2012	95093211	95101509	8298
chr2	154	4182598	1800	826	Fan 2013	95469141	95474341	5201
chr2	155	4195078	1801	827	Fan 2013	95624621	95637101	12481
chr2	156	4204438	1802	828	Fan 2013	95664141	95673501	9361
chr2	156	4206326	1803	828	wang2010	95665092	95675389	10297
chr2	156	4206326	1803	828	wang2010	95665092	95675389	10297
chr2	156	4206326	1803	828	wang2010	95665092	95675389	10297
chr2	156	4206326	1803	828	wang2010	95665092	95675389	10297
chr2	157	4213086	1804	829	Fan 2013	96152421	96159181	6761
chr2	158	4244369	1805	830	Crooijmans, 2013	96744385	96775668	31283
chr2	159	4261170	1806	831	Crooijmans, 2013	97164917	97181718	16801
chr2	160	4306009	1807	832	wang2010	97295434	97340273	44839
chr2	160	4306009	1808	832	Crooijmans, 2013	97308766	97338589	29823
chr2	160	4306009	1809	832	Crooijmans, 2013	97312205	97338589	26384
chr2	160	4306009	1809	832	wang 2012	97312205	97338589	26384
chr2	160	4306009	1809	832	wang 2012	97312205	97338589	26384
chr2	160	4306009	1809	832	wang 2012	97312205	97338589	26384
chr2	160	4306009	1810	832	wang2010	97312561	97337890	25329
chr2	160	4306009	1810	832	wang2010	97312561	97337890	25329
chr2	160	4306009	1810	832	wang2010	97312561	97337890	25329
chr2	160	4306009	1811	832	wang2010	97312561	97340273	27712
chr2	160	4306009	1812	832	Crooijmans, 2013	97315220	97338589	23369
chr2	160	4306877	1813	832	Fan 2013	97321381	97341141	19761
chr2	161	4321835	1814	833	wang 2012	98658797	98673755	14958
chr2	162	4345483	1815	834	Crooijmans, 2013	98703710	98727358	23648
chr2	163	4369919	1816	835	Crooijmans, 2013	99057820	99082256	24436
chr2	163	4369919	1817	835	Crooijmans, 2013	99060971	99082256	21285
chr2	164	4394661	1818	836	Crooijmans, 2013	99296576	99321318	24742
chr2	165	4412346	1819	837	Crooijmans, 2013	99354562	99372247	17685
chr2	166	4419318	1820	838	Crooijmans, 2013	99568337	99575309	6972
chr2	167	4426202	1821	839	Crooijmans, 2013	99805363	99812247	6884
chr2	168	4483873	1822	840	Crooijmans, 2013	99931714	99989385	57671
chr2	168	4483873	1823	840	Crooijmans, 2013	99941559	99951474	9915
chr2	168	4483873	1824	840	Crooijmans, 2013	99941559	99983357	41798
chr2	169	4507683	1825	841	Crooijmans, 2013	100260230	100284040	23810
chr2	170	4531533	1826	842	Crooijmans, 2013	100547710	100571560	23850
chr2	170	4549953	1827	842	Crooijmans, 2013	100547710	100589980	42270
chr2	170	4549953	1828	842	Crooijmans, 2013	100551540	100571560	20020
chr2	170	4549953	1829	842	Crooijmans, 2013	100561560	100568660	7100
chr2	170	4549953	1830	842	Crooijmans, 2013	100561560	100580060	18500
chr2	170	4569303	1831	842	Crooijmans, 2013	100587370	100609330	21960
chr2	171	4605543	1832	843	Crooijmans, 2013	100664000	100700240	36240
chr2	172	4636643	1833	844	Crooijmans, 2013	101002650	101033750	31100
chr2	172	4648233	1834	844	Crooijmans, 2013	101006870	101045340	38470
chr2	172	4654263	1835	844	Crooijmans, 2013	101006870	101051370	44500
chr2	172	4654263	1836	844	Crooijmans, 2013	101040810	101051370	10560
chr2	173	4681563	1837	845	Crooijmans, 2013	101227510	101254810	27300
chr2	174	4702953	1838	846	Crooijmans, 2013	101281370	101302760	21390
chr2	175	4738003	1839	847	Crooijmans, 2013	101510660	101545710	35050
chr2	175	4738003	1840	847	Crooijmans, 2013	101515710	101542490	26780
chr2	175	4738003	1841	847	Crooijmans, 2013	101515710	101545710	30000
chr2	176	4759623	1842	848	Crooijmans, 2013	101621480	101643100	21620
chr2	177	4785503	1843	849	Crooijmans, 2013	101795110	101820990	25880
chr2	178	4806393	1844	850	Crooijmans, 2013	101848920	101869810	20890
chr2	178	4806393	1845	850	Crooijmans, 2013	101851550	101866920	15370
chr2	179	4827573	1846	851	Crooijmans, 2013	101983210	102004390	21180
chr2	180	4844473	1847	852	Crooijmans, 2013	102176730	102193630	16900
chr2	181	4879493	1848	853	Crooijmans, 2013	102979460	103014480	35020
chr2	182	4895573	1849	854	Crooijmans, 2013	103563320	103579400	16080
chr2	183	4935743	1850	855	Crooijmans, 2013	103671010	103711180	40170
chr2	184	4952283	1851	856	Crooijmans, 2013	104442840	104459380	16540
chr2	185	4974713	1852	857	Crooijmans, 2013	105584570	105607000	22430
chr2	186	4980433	1853	858	Fan 2013	105791141	105796861	5721
chr2	187	4991603	1854	859	Crooijmans, 2013	105876350	105887520	11170
chr2	188	5014623	1855	860	Crooijmans, 2013	105907370	105930390	23020
chr2	189	5027363	1856	861	Crooijmans, 2013	106507040	106519780	12740
chr2	190	5051073	1857	862	Crooijmans, 2013	108309900	108333610	23710
chr2	191	5058993	1858	863	Crooijmans, 2013	108653790	108661710	7920
chr2	191	5062093	1859	863	Crooijmans, 2013	108653790	108664810	11020
chr2	192	5080303	1860	864	Crooijmans, 2013	109695460	109713670	18210
chr2	193	5095553	1861	865	Crooijmans, 2013	111250680	111265930	15250
chr2	193	5108603	1862	865	Crooijmans, 2013	111250680	111278980	28300
chr2	193	5112543	1863	865	Crooijmans, 2013	111250680	111282920	32240
chr2	193	5123233	1864	865	Crooijmans, 2013	111250680	111293610	42930
chr2	193	5123233	1865	865	Crooijmans, 2013	111254830	111282920	28090
chr2	193	5123233	1866	865	Crooijmans, 2013	111254830	111293610	38780
chr2	193	5134353	1867	865	Crooijmans, 2013	111254830	111304730	49900
chr2	193	5134353	1868	865	Crooijmans, 2013	111278920	111293610	14690
chr2	194	5144063	1869	866	Crooijmans, 2013	111716060	111725770	9710
chr2	194	5151003	1870	866	Crooijmans, 2013	111719840	111732710	12870
chr2	195	5193591	1871	867	wang2010	111757562	111800150	42588
chr2	196	5199311	1872	868	Fan 2013	111980181	111985901	5721
chr2	197	5233071	1873	869	Crooijmans, 2013	112368440	112402200	33760
chr2	198	5264131	1874	870	Crooijmans, 2013	112936000	112967060	31060
chr2	199	5292981	1875	871	Crooijmans, 2013	112991050	113019900	28850
chr2	200	5305071	1876	872	Crooijmans, 2013	113241380	113253470	12090
chr2	201	5327541	1877	873	Crooijmans, 2013	113486820	113509290	22470
chr2	202	5333271	1878	874	Crooijmans, 2013	113775830	113781560	5730
chr2	203	5350841	1879	875	Crooijmans, 2013	113828460	113846030	17570
chr2	204	5360851	1880	876	Crooijmans, 2013	114160090	114170100	10010
chr2	205	5366851	1881	877	Crooijmans, 2013	114545690	114551690	6000
chr2	206	5382171	1882	878	Crooijmans, 2013	115068490	115083810	15320
chr2	207	5416651	1883	879	Crooijmans, 2013	115352810	115387290	34480
chr2	207	5416651	1884	879	Crooijmans, 2013	115374560	115387290	12730
chr2	208	5421851	1885	880	Fan 2013	115662301	115667501	5201
chr2	209	5436221	1886	881	Crooijmans, 2013	115767640	115782010	14370
chr2	209	5453531	1887	881	Crooijmans, 2013	115775440	115799320	23880
chr2	210	5461579	1888	882	wang 2012	116280568	116288616	8048
chr2	211	5468169	1889	883	Crooijmans, 2013	116656150	116662740	6590
chr2	211	5468169	1889	883	Crooijmans, 2013	116656150	116662740	6590
chr2	211	5478789	1890	883	Crooijmans, 2013	116656150	116673360	17210
chr2	211	5478789	1890	883	Crooijmans, 2013	116656150	116673360	17210
chr2	211	5496629	1891	883	Crooijmans, 2013	116656150	116691200	35050
chr2	211	5496629	1892	883	Crooijmans, 2013	116673300	116684740	11440
chr2	212	5520489	1893	884	Crooijmans, 2013	116726230	116750090	23860
chr2	213	5538349	1894	885	Crooijmans, 2013	116755160	116773020	17860
chr2	213	5578309	1895	885	Crooijmans, 2013	116772960	116812980	40020
chr2	214	5590549	1896	886	Crooijmans, 2013	117261920	117274160	12240
chr2	215	5611249	1897	887	Crooijmans, 2013	117409290	117429990	20700
chr2	215	5622869	1898	887	Crooijmans, 2013	117425160	117441610	16450
chr2	216	5628589	1899	888	Fan 2013	117532221	117537941	5721
chr2	217	5634309	1900	889	Fan 2013	117758941	117764661	5721
chr2	218	5659999	1901	890	Crooijmans, 2013	117886140	117911830	25690
chr2	219	5702449	1902	891	Crooijmans, 2013	118018480	118060930	42450
chr2	220	5709209	1903	892	Fan 2013	119125501	119132261	6761
chr2	221	5724219	1904	893	Crooijmans, 2013	119175450	119190460	15010
chr2	222	5740219	1905	894	Crooijmans, 2013	119334760	119350760	16000
chr2	223	5779419	1906	895	wang 2012	119605550	119644750	39200
chr2	224	5787739	1907	896	Fan 2013	119695941	119704261	8321
chr2	225	5793979	1908	897	Fan 2013	119706861	119713101	6241
chr2	226	5799699	1909	898	Fan 2013	119738061	119743781	5721
chr2	227	5854129	1910	899	Crooijmans, 2013	119945430	119999860	54430
chr2	228	5874999	1911	900	Crooijmans, 2013	120097120	120117990	20870
chr2	228	5881889	1912	900	Crooijmans, 2013	120097120	120124880	27760
chr2	229	5901279	1913	901	Crooijmans, 2013	120310130	120329520	19390
chr2	229	5901279	1914	901	Crooijmans, 2013	120315930	120329520	13590
chr2	229	5914859	1915	901	Crooijmans, 2013	120315930	120343100	27170
chr2	229	5914859	1916	901	Crooijmans, 2013	120326500	120343100	16600
chr2	230	5943009	1917	902	Crooijmans, 2013	120355650	120383800	28150
chr2	230	5958949	1918	902	Crooijmans, 2013	120375350	120399740	24390
chr2	230	5966089	1919	902	Crooijmans, 2013	120375350	120406880	31530
[truncated: 2,209 more rows]
